# Supplementary material for: Multicomponent synthesis of fully substituted thiazoles using glycine-based dithiocarbamates, acetic anhydride and nitroalkenes
Source: Royal Society of Chemistry journal article supplement (doi:10.1039/d2ob00448h), 2022-01-01

*Supporting Information*

**Multicomponent synthesis of fully substituted thiazoles using  
glycine-based dithiocarbamates, acetic anhydride and nitroalkenes**

Azim Ziyaei Halimehjani,\* Maryam Saeb, Maryam Khalesi

*Faculty of Chemistry, Kharazmi University, P.O. Box 15719-14911, 49 Mofateh Street, Tehran,  
Iran.*

*E-mail: [ziyaei@khu.ac.ir](mailto:ziyaei@khu.ac.ir)*

| <b>Content</b>                                                                      | <b>Pages</b> |
|-------------------------------------------------------------------------------------|--------------|
| Experimental section: general procedures and characterization data for all products | 2-8          |
| Copies of <sup>1</sup> H and <sup>13</sup> C NMR spectra for all products           | 8-28         |

## EXPERIMENTAL SECTION

**General.** Chemicals were purchased from commercial suppliers and used without further purification. Glycine-based dithiocarbamates and nitroalkenes were prepared according to the literatures. Thin layer chromatography (TLC) was performed on aluminum plates coated with silica-gel 60 F254 (Merck). The TLC plates were visualized by UV fluorescence ( $\lambda_{\text{max}} = 254$  nm).  $^1\text{H}$  and  $^{13}\text{C}$  NMR analyses were recorded on a Bruker Avance 300 ( $^1\text{H}$ -NMR: 300 MHz,  $^{13}\text{C}$ -NMR: 75 MHz,  $^1\text{H}$  decoupled). All NMR spectra were reported in parts per million (ppm) and measured relative to residual solvent  $\text{CHCl}_3$  [ $\delta$  ( $\text{CHCl}_3$ ): 7.27 ppm or  $\delta$  ( $\text{CHCl}_3$ ): 77.16 ppm]. HRMS (High Resolution Mass Spectra) was measured on a THERMO SCIENTIFIC Advantage and a THERMO SCIENTIFIC Exactive instrument equipped with an APCI source in the positive-ion mode.

**General Procedure for the synthesis of thiazole derivatives 3a-t:** A mixture of dithiocarbamate (0.5 mmol), nitroalkene (0.5 mmol), acetic anhydride (1.5 mmol), and sodium acetate (0.5 mmol) was stirred at 85 °C for 1 h under neat conditions. Progress of the reaction was monitored by TLC (eluent: petroleum ether / ethyl acetate, 8:2). After completion of the reaction, the reaction mixture was purified by flash column chromatography (silica gel, petroleum ether / ethyl acetate; 5/1). The structures of the products were confirmed by  $^1\text{H}$  and  $^{13}\text{C}$  NMR and HRMS analyses.

*2-(benzylsulfanyl)-4-(2-nitro-1-phenylethyl)-1,3-thiazol-5-yl acetate (3a):* Pale yellow oil (70%, 145 mg);  $^1\text{H}$  NMR (300 MHz,  $\text{CDCl}_3$ )  $\delta$  7.42–7.22 (m, 10H), 5.22 (dd,  $J = 12.4, 7.7$  Hz, 1H), 4.98 (dd,  $J = 14.5, 6.9$  Hz, 1H), 4.91 (dd,  $J = 12.4, 6.9$  Hz, 1H), 4.37 (AB<sub>q</sub>,  $J = 13.3$  Hz, 2H), 2.28 (s, 3H) ppm;  $^{13}\text{C}$  NMR ( $\text{CDCl}_3$ , 75.5 MHz):  $\delta$  166.1, 155.8, 141.3, 138.4, 137.6 ,

136.6, 128.9, 128.9, 128.5, 127.9, 127.8, 127.5, 78.2, 42.1, 38.6, 20.3 ppm; HRMS (ESI) calculated for  $C_{20}H_{19}N_2O_4S_2 [M+H]^+$ : 415.0786; Found: 415.0782.

*2-(benzylsulfanyl)-4-[2-nitro-1-(thiophen-2-yl)ethyl]-1,3-thiazol-5-yl acetate (3b)*: Pale yellow oil (85%, 178 mg);  $^1H$  NMR (300 MHz,  $CDCl_3$ )  $\delta$  7.37–7.21 (m, 6H), 6.99–6.93 (m, 2H), 5.36–5.29 (t,  $J = 6.9$  Hz, 1H), 5.15 (dd,  $J = 13.3, 8.5$  Hz, 1H), 4.94 (dd,  $J = 13.3, 6.9$  Hz, 1H), 4.39 (s, 2H), 2.34 (s, 3H) ppm;  $^{13}C$  NMR (75 MHz,  $CDCl_3$ )  $\delta$  166.1, 156.6, 141.5, 139.5, 137.5, 136.5, 128.9, 128.6, 127.5, 126.9, 125.9, 125.4, 78.5, 38.6, 37.3, 20.3 ppm; HRMS (ESI) calculated for  $C_{18}H_{17}N_2O_4S_3 [M+H]^+$ : 421.0350; Found: 421.0348.

*2-(benzylsulfanyl)-4-[1-(4-methoxyphenyl)-2-nitroethyl]-1,3-thiazol-5-yl acetate (3c)*: Pale yellow oil (60%, 133 mg);  $^1H$  NMR (300 MHz,  $CDCl_3$ )  $\delta$  7.37–7.26 (m, 5H), 7.24 (d,  $J = 8.7$  Hz, 2H), 6.85 (d,  $J = 8.7$  Hz, 2H), 5.17 (dd,  $J = 11.5, 6.8$  Hz, 1H), 4.98–4.84 (m, 2H), 4.38 (AB<sub>q</sub>,  $J = 13.0$  Hz, 2H), 3.79 (s, 3H), 2.29 (s, 3H) ppm;  $^{13}C$  NMR ( $CDCl_3$ , 75.5 MHz):  $\delta$  166.1, 158.9, 155.9, 141.0, 138.6, 136.5, 129.5, 128.9, 128.8, 128.5, 127.5, 114.2, 78.3, 55.1, 41.2, 38.5, 20.3 ppm; HRMS (ESI) calculated for  $C_{21}H_{21}N_2O_5S_2 [M+H]^+$ : 445.0892; Found: 445.0889.

*2-(benzylsulfanyl)-4-[1-(naphthalen-1-yl)-2-nitroethyl]-1,3-thiazol-5-yl acetate (3d)*: Pale yellow oil (51%, 118 mg);  $^1H$  NMR (300 MHz,  $CDCl_3$ )  $\delta$  8.31 (d,  $J = 8.4$  Hz, 1H), 7.92 (d,  $J = 8.0$  Hz, 1H), 7.85–7.76 (m, 1H), 7.67–7.51 (m, 2H), 7.47–7.36 (m, 2H), 7.34–7.25 (m, 5H), 5.93 (dd,  $J = 9.5, 5.5$  Hz, 1H), 5.47 (dd,  $J = 13.7, 9.6$  Hz, 1H), 4.98 (dd,  $J = 13.7, 5.5$  Hz, 1H), 4.40 (AB<sub>q</sub>,  $J = 13$  Hz, 2H), 2.12 (s, 3H) ppm;  $^{13}C$  NMR ( $CDCl_3$ , 75.5 MHz):  $\delta$  165.9, 155.9, 141.4, 138.4, 136.6, 133.9, 133.3, 130.6, 129.2, 128.8, 128.5, 128.4, 127.4, 126.7, 125.9, 125.8, 125.4, 122.1, 38.5, 37.2, 29.62, 20.1 ppm; HRMS (ESI) calculated for  $C_{24}H_{21}N_2O_4S_2 [M+H]^+$ : 465.0943; Found: 465.0942.

*4-(2-nitro-1-phenylethyl)-2-(prop-2-en-1-ylsulfanyl)-1,3-thiazol-5-yl acetate (3e)*: Pale yellow oil (72%, 131 mg); <sup>1</sup>H NMR (CDCl<sub>3</sub>, 300.1 MHz): δ 7.42–7.22 (m, 5H), 5.98–5.85 (m, 1H), 5.28–5.10 (m, 3H), 5.04–4.86 (m, 2H), 3.77 (d, *J* = 7 Hz, 2H), 2.28 (s, 3H) ppm; <sup>13</sup>C NMR (CDCl<sub>3</sub>, 75.5 MHz): δ 166.1, 155.8, 141.3, 138.4, 137.5, 132.5, 128.8, 127.9, 127.8, 118.7, 78.1, 42.1, 37.3, 20.2 ppm; HRMS (ESI) calculated for C<sub>16</sub>H<sub>17</sub>N<sub>2</sub>O<sub>4</sub>S<sub>2</sub> [M+H]<sup>+</sup>: 365.0630; Found: 365.0628.

*4-[2-nitro-1-(thiophen-2-yl)ethyl]-2-(prop-2-en-1-ylsulfanyl)-1,3-thiazol-5-yl acetate (3f)*: Pale yellow oil (81%, 150 mg); <sup>1</sup>H NMR (CDCl<sub>3</sub>, 300.1 MHz): δ 7.24 (dd, *J* = 5.1, 1.2 Hz, 3H), 7.02–6.92 (m, 2H), 6.02–5.85 (m, 1H), 5.32 (dd, *J* = 8.3, 7.0 Hz, 1H), 5.26 – 5.11 (m, 3H), 4.94 (dd, *J* = 13.2, 6.8 Hz, 1H), 3.79 (d, *J* = 7 Hz, 2H), 2.35 (s, 3H) ppm; <sup>13</sup>C NMR (CDCl<sub>3</sub>, 75.5 MHz) δ 166.1, 156.4, 141.5, 139.6, 137.5, 132.5, 126.8, 125.9, 125.4, 118.8, 78.5, 37.4, 37.2, 20.3 ppm; HRMS (ESI) calculated for C<sub>14</sub>H<sub>15</sub>N<sub>2</sub>O<sub>4</sub>S<sub>3</sub> [M+H]<sup>+</sup>: 371.0194; Found: 371.0193.

*4-[1-(4-methoxyphenyl)-2-nitroethyl]-2-(prop-2-en-1-ylsulfanyl)-1,3-thiazol-5-yl acetate (3g)*: Pale yellow oil (54%, 106 mg); <sup>1</sup>H NMR (CDCl<sub>3</sub>, 300.1 MHz): δ 7.28 (dd, *J* = 6.8, 2.1 Hz, 2H), 6.85 (dd, *J* = 6.8, 2.0 Hz, 2H), 5.98–5.82 (m, 1H), 5.23–5.08 (m, 3H), 4.98–4.84 (m, 2H), 3.78 (s, 3H), 3.75 (d, *J* = 7.1 Hz, 2H), 2.29 (s, 3H) ppm; <sup>13</sup>C NMR (CDCl<sub>3</sub>, 75.5 MHz): δ 166.0, 158.9, 155.6, 141.0, 138.7, 132.5, 129.4, 128.9, 118.7, 114.1, 78.2, 55.1, 41.2, 37.2, 20.2 ppm; HRMS (ESI) calculated for C<sub>17</sub>H<sub>19</sub>N<sub>2</sub>O<sub>5</sub>S<sub>2</sub> [M+H]<sup>+</sup>: 395.0735; Found: 395.0731.

*4-[1-(naphthalen-1-yl)-2-nitroethyl]-2-(prop-2-en-1-ylsulfanyl)-1,3-thiazol-5-yl acetate (3h)*: Pale yellow oil (46%, 95 mg); <sup>1</sup>H NMR (CDCl<sub>3</sub>, 300.1 MHz): δ 8.32 (d, *J* = 8.5 Hz, 1H), 7.91 (d, *J* = 8.0 Hz, 1H), 7.81 (d, *J* = 7.7 Hz, 1H), 7.65–7.50 (m, 2H), 7.49–7.39 (m, 2H), 6.02 – 5.83 (m, 2H), 5.48 (dd, *J* = 13.9, 10.0 Hz, 1H), 5.25–5.10 (m, 2H), 4.97 (dd, *J* = 13.6, 6.0 Hz,

1H), 3.80 (dd,  $J = 7.0, 0.7$  Hz, 2H), 2.12 (s, 3H) ppm;  $^{13}\text{C}$  NMR ( $\text{CDCl}_3$ , 75.5 MHz):  $\delta$  165.9, 155.7, 141.4, 138.5, 133.9, 133.3, 132.5, 130.7, 129.2, 128.4, 126.7, 126.0, 125.8, 125.4, 122.2, 118.7, 77.4, 37.4, 37.3, 20.1 ppm; HRMS (ESI) calculated for  $\text{C}_{20}\text{H}_{19}\text{N}_2\text{O}_4\text{S}_2$   $[\text{M}+\text{H}]^+$ : 415.0786; Found: 415.0781.

*2-(butylsulfanyl)-4-(2-nitro-1-phenylethyl)-1,3-thiazol-5-yl acetate (3i)*: Pale yellow oil (70%, 133 mg);  $^1\text{H}$  NMR ( $\text{CDCl}_3$ , 300.1 MHz):  $\delta$  7.46 – 7.23 (m, 5H), 5.30 – 5.14 (m, 1H), 5.03 – 4.84 (m, 2H), 3.23 – 3.02 (m, 2H), 2.28 (s, 3H), 1.79 – 1.65 (m, 2H), 1.54-1.40 (m, 2H), 0.99-0.90 (m, 3H) ppm;  $^{13}\text{C}$  NMR ( $\text{CDCl}_3$ , 75.5 MHz):  $\delta$  166.1, 157.6, 140.8, 138.2, 137.6, 128.8, 127.9, 127.8, 78.2, 42.1, 33.9, 31.4, 21.8, 20.2, 13.5 ppm; HRMS (ESI) calculated for  $\text{C}_{17}\text{H}_{21}\text{N}_2\text{O}_4\text{S}_2$   $[\text{M}+\text{H}]^+$ : 381.0943; Found: 381.0940.

*2-(butylsulfanyl)-4-[2-nitro-1-(thiophen-2-yl)ethyl]-1,3-thiazol-5-yl acetate (3j)*: Pale yellow oil (88%, 170 mg);  $^1\text{H}$  NMR ( $\text{CDCl}_3$ , 300.1 MHz):  $\delta$  7.23 (dd,  $J = 5.1, 1.1$  Hz, 1H), 7.02-6.98 (m, 1H), 6.97-6.92 (m, 1H), 5.34–5.28 (m, 1H), 5.15 (dd,  $J = 13.1, 8.4$  Hz, 1H), 4.93 (dd,  $J = 13.2, 6.9$  Hz, 1H), 3.22-3.12 (m, 2H), 2.35 (s, 3H), 1.79–1.67 (m, 2H), 1.55-1.40 (m, 2H), 0.99-0.91 (m, 3H) ppm;  $^{13}\text{C}$  NMR ( $\text{CDCl}_3$ , 75.5 MHz):  $\delta$  166.2, 158.1, 140.9, 139.6, 137.3, 126.8, 125.9, 125.4, 78.6, 37.4, 33.8, 31.3, 21.8, 20.3, 13.5 ppm; HRMS (ESI) calculated for  $\text{C}_{15}\text{H}_{20}\text{N}_2\text{O}_4\text{S}_3$   $[\text{M}+\text{H}]^+$ : 365.0507; Found: 365.0505.

*2-(butylsulfanyl)-4-[1-(4-chlorophenyl)-2-nitroethyl]-1,3-thiazol-5-yl acetate (3k)*: Pale yellow oil (72%, 149 mg);  $^1\text{H}$  NMR ( $\text{CDCl}_3$ , 300.1 MHz):  $\delta$  7.34-7.28 (m, 4H), 5.14 (dd,  $J = 10.6, 5.6$  Hz, 1H), 4.99 – 4.86 (m, 2H), 3.15 (t,  $J = 7.3$  Hz, 2H), 2.31 (s, 3H), 1.78 - 1.66 (m, 2H), 1.55-1.47 (m, 2H), 0.96 (t,  $J = 7.3$  Hz, 3H) ppm;  $^{13}\text{C}$  NMR ( $\text{CDCl}_3$ , 75.5 MHz):  $\delta$  166.1,

158.0, 140.8, 137.6, 136.0, 133.7, 129.3, 129.0, 78.0, 41.4, 33.8, 31.3, 21.8, 20.3, 13.5 ppm; HRMS (ESI) calculated for  $C_{17}H_{20}ClN_2O_4S_2$   $[M+H]^+$ : 415.0553; Found: 415.0549.

*2-(butylsulfanyl)-4-[2-nitro-1-(3-nitrophenyl)ethyl]-1,3-thiazol-5-yl acetate (3l)*: Brown oil (80%, 170 mg);  $^1H$  NMR ( $CDCl_3$ , 300.1 MHz):  $\delta$  8.32 (t,  $J = 1.9$  Hz, 1H), 8.15 (d,  $J = 9.5$  Hz, 1H), 7.75 (d,  $J = 7.8$  Hz, 1H), 7.52 (t,  $J = 8.0$  Hz, 1H), 5.16 (dd,  $J = 10.7, 6.2$  Hz, 1H), 5.10 (dd,  $J = 13.1, 6.6$  Hz, 1H), 5.02 (dd,  $J = 10.7, 6.6$  Hz, 1H), 3.18 (t,  $J = 6.5$  Hz, 2H), 2.35 (s, 3H), 1.77-1.65 (m, 2H), 1.54-1.38 (m, 2H), 0.95 (t,  $J = 7.3$  Hz, 3H) ppm;  $^{13}C$  NMR ( $CDCl_3$ , 75.5 MHz):  $\delta$  166.0, 158.8, 148.3, 141.2, 139.5, 136.4, 134.1, 129.9, 123.1, 122.9, 77.7, 41.4, 33.7, 31.2, 21.7, 20.3, 13.5 ppm; HRMS (ESI) calculated for  $C_{17}H_{20}N_3O_6S_2$   $[M+H]^+$ : 426.0794; Found: 426.0789.

*4-[2-nitro-1-(thiophen-2-yl)ethyl]-2-(propan-2-ylsulfanyl)-1,3-thiazol-5-yl acetate (3m)*: Pale yellow oil (65%, 121 mg);  $^1H$  NMR ( $CDCl_3$ , 300.1 MHz)  $\delta$  7.22 (d,  $J = 5.1$  Hz, 1H), 7.00 (d,  $J = 3.3$  Hz, 1H), 6.94 (dd,  $J = 5.0, 3.7$  Hz, 1H), 5.32 (t,  $J = 7.2$  Hz, 1H), 5.18 (dd,  $J = 13.2, 8.6$  Hz, 1H), 4.94 (dd,  $J = 13.1, 6.9$  Hz, 1H), 3.80-3.70 (m, 1H), 2.35 (s, 3H), 1.40 (d,  $J = 6.8$  Hz, 6H) ppm;  $^{13}C$  NMR ( $CDCl_3$ , 75.5 MHz)  $\delta$  166.0, 156.2, 141.7, 139.6, 137.7, 126.8, 125.9, 125.4, 78.5, 40.3, 37.2, 23.1, 23.0, 20.3; HRMS (ESI) calculated for  $C_{14}H_{17}N_2O_4S_3$   $[M+H]^+$ : 373.0350; Found: 373.0346.

*4-[1-(2,4-dichlorophenyl)-2-nitroethyl]-2-(propan-2-ylsulfanyl)-1,3-thiazol-5-yl acetate (3n)*: Pale yellow oil (58%, 126 mg);  $^1H$  NMR ( $CDCl_3$ , 300.1 MHz)  $\delta$  7.43 (d,  $J = 2.1$  Hz, 1H), 7.37 (d,  $J = 8.5$  Hz, 1H), 7.23 (dd,  $J = 8.5, 2.1$  Hz, 1H), 5.57 (dd,  $J = 9.2, 6.3$  Hz, 1H), 5.20 (dd,  $J = 13.6, 9.2$  Hz, 1H), 4.85 (dd,  $J = 13.6, 6.3$  Hz, 1H), 3.79-3.63 (m, 1H), 2.31 (s, 3H), 1.39 (d,  $J = 6.7$  Hz, 6H) ppm;  $^{13}C$  NMR ( $CDCl_3$ , 75.5 MHz)  $\delta$  166.0, 156.2, 142.1, 137.3, 134.1, 133.9,

133.6, 130.3, 129.5, 127.7, 77.2, 40.3, 37.2, 23.0, 22.9, 20.2 ppm; HRMS (ESI) calculated for  $C_{16}H_{17}Cl_2N_2O_4S_2$   $[M+H]^+$ : 435.0007; Found: 435.0004.

*4-[1-(4-chlorophenyl)-2-nitroethyl]-2-(propan-2-ylsulfanyl)-1,3-thiazol-5-yl acetate (3o)*: Pale yellow oil (60%, 120 mg);  $^1H$  NMR ( $CDCl_3$ , 300.1 MHz)  $\delta$  7.44–7.10 (m, 4H), 5.18 (dd,  $J$  = 11.7, 6.9 Hz, 1H), 5.01–4.86 (m, 2H), 3.79–3.64 (m, 1H), 2.30 (s, 3H), 1.42 – 1.37 (m, 6H) ppm;  $^{13}C$  NMR ( $CDCl_3$ , 75.5 MHz)  $\delta$  166.0, 156.1, 141.7, 138.0, 136.0, 133.7, 129.2, 129.0, 78.0, 41.4, 40.3, 23.1, 23.0, 20.3 ppm; HRMS (ESI) calculated for  $C_{16}H_{18}ClN_2O_4S_2$   $[M+H]^+$ : 401.0397; Found: 401.0392.

*2-(hexylsulfanyl)-4-(2-nitro-1-phenylethyl)-1,3-thiazol-5-yl acetate (3p)*: Pale yellow oil (88%, 179 mg);  $^1H$  NMR ( $CDCl_3$ , 300.1 MHz)  $\delta$  7.40 – 7.22 (m, 5H), 5.22 (dd,  $J$  = 12.1, 7.4 Hz, 1H), 5.03–4.86 (m, 2H), 3.16 (t,  $J$  = 7.3 Hz, 2H), 2.27 (s, 3H), 1.81–1.66 (m, 2H), 1.51–1.26 (m, 6H), 0.92 (t,  $J$  = 6.7 Hz, 3H) ppm;  $^{13}C$  NMR ( $CDCl_3$ , 75.5 MHz)  $\delta$  166.1, 157.5, 140.7, 138.1, 137.5, 128.8, 127.8, 127.7, 78.1, 42.0, 34.1, 31.2, 29.2, 28.3, 22.4, 20.2, 13.9 ppm; HRMS (ESI) calculated for  $C_{19}H_{25}N_2O_4S_2$   $[M+H]^+$ : 409.1256; Found: 409.1252.

*2-(hexylsulfanyl)-4-[2-nitro-1-(thiophen-2-yl)ethyl]-1,3-thiazol-5-yl acetate (3q)*: Pale yellow oil (84%, 174 mg);  $^1H$  NMR ( $CDCl_3$ , 300.1 MHz)  $\delta$  7.23 (d,  $J$  = 5.0 Hz, 1H), 7.00 (d,  $J$  = 3.2 Hz, 1H), 6.95 (dd,  $J$  = 5.0, 3.6 Hz, 1H), 5.31 (t,  $J$  = 7.4 Hz, 1H), 5.14 (dd,  $J$  = 13.2, 8.3 Hz, 1H), 4.93 (dd,  $J$  = 13.2, 7.0 Hz, 1H), 3.22–3.11 (m, 2H), 2.34 (s, 3H), 1.80–1.67 (m, 2H), 1.51 – 1.26 (m, 6H), 0.91 (t,  $J$  = 6.7 Hz, 3H) ppm;  $^{13}C$  NMR ( $CDCl_3$ , 75.5 MHz)  $\delta$  166.1, 158.1, 140.9, 139.6, 137.2, 126.8, 125.9, 125.4, 78.5, 37.4, 34.1, 31.2, 29.3, 28.3, 22.4, 20.3, 13.9 ppm; HRMS (ESI) calculated for  $C_{17}H_{23}N_2O_4S_3$   $[M+H]^+$ : 415.0820; Found: 415.0816.

*4-[1-(4-chlorophenyl)-2-nitroethyl]-2-(hexylsulfanyl)-1,3-thiazol-5-yl acetate (3r)*: Pale yellow oil (45%, 99 mg); <sup>1</sup>H NMR (CDCl<sub>3</sub>, 300.1 MHz) δ 7.41–7.23 (m, 4H), 5.15 (dd, *J* = 13.5, 8.5 Hz, 1H), 4.99 – 4.87 (m, 2H), 3.14 (t, *J* = 7.3 Hz, 2H), 2.29 (s, 3H), 1.82–1.63 (m, 2H), 1.53–1.23 (m, 6H), 0.91 (t, *J* = 6.6 Hz, 3H) ppm; <sup>13</sup>C NMR (CDCl<sub>3</sub>, 75.5 MHz) δ 166.1, 158.0, 140.8, 137.5, 136.0, 133.7, 129.2, 129.0, 78.0, 41.3, 34.1, 31.2, 29.2, 28.3, 22.4, 20.2, 13.9 ppm; HRMS (ESI) calculated for C<sub>19</sub>H<sub>24</sub>ClN<sub>2</sub>O<sub>4</sub>S<sub>2</sub> [M+H]<sup>+</sup>: 443.0866; Found: 443.0861.

*2-(hexylsulfanyl)-4-[2-nitro-1-(3-nitrophenyl)ethyl]-1,3-thiazol-5-yl acetate (3s)*: Pale yellow oil (86%, 195 mg); <sup>1</sup>H NMR (CDCl<sub>3</sub>, 300.1 MHz) δ 8.32 (s, 1H), 8.15 (d, *J* = 7.3 Hz, 1H), 7.75 (d, *J* = 7.7 Hz, 1H), 7.52 (t, *J* = 8.0 Hz, 1H), 5.20–5.01 (m, 3H), 3.17 (t, *J* = 7.3 Hz, 2H), 2.35 (s, 3H), 1.82–1.65 (m, 2H), 1.52–1.38 (m, 2H), 1.38–1.20 (m, 4H), 0.90 (t, *J* = 6.5 Hz, 3H) ppm; <sup>13</sup>C NMR (CDCl<sub>3</sub>, 75.5 MHz) δ 166.0, 158.9, 148.3, 141.2, 139.5, 136.4, 134.0, 129.9, 123.2, 122.9, 77.7, 41.4, 34.1, 31.2, 29.2, 28.3, 22.4, 20.3, 13.9 ppm; HRMS (ESI) calculated for C<sub>19</sub>H<sub>24</sub>N<sub>3</sub>O<sub>6</sub>S<sub>2</sub> [M+H]<sup>+</sup>: 454.1107; Found: 454.1105.

*2-(hexylsulfanyl)-4-[2-nitro-1-(4-nitrophenyl)ethyl]-1,3-thiazol-5-yl acetate (3t)*: Pale yellow oil (65%, 147 mg); <sup>1</sup>H NMR (CDCl<sub>3</sub>, 300.1 MHz) δ 8.18 (d, *J* = 8.7 Hz, 2H), 7.58 (d, *J* = 8.7 Hz, 2H), 5.17 (dd, *J* = 11.4, 6.7 Hz, 1H), 5.10 (dd, *J* = 14.2, 7.3 Hz, 1H), 5.00 (dd, *J* = 11.5, 6.8 Hz, 1H), 3.15 (t, *J* = 7.3 Hz, 2H), 2.33 (s, 3H), 1.79–1.66 (m, 2H), 1.51–1.39 (m, 2H), 1.36–1.25 (m, 4H), 0.90 (t, *J* = 6.6 Hz, 3H) ppm; <sup>13</sup>C NMR (CDCl<sub>3</sub>, 75.5 MHz) δ 166.0, 158.8, 147.3, 144.7, 141.2, 136.3, 128.9, 124.0, 77.5, 41.5, 34.1, 31.2, 29.1, 28.3, 22.4, 20.3, 13.9 ppm; HRMS (ESI) calculated for C<sub>19</sub>H<sub>24</sub>N<sub>3</sub>O<sub>6</sub>S<sub>2</sub> [M+H]<sup>+</sup>: 454.1107; Found: 454.1103.



# Copies of $^1\text{H}$ and $^{13}\text{C}$ NMR spectra for all products

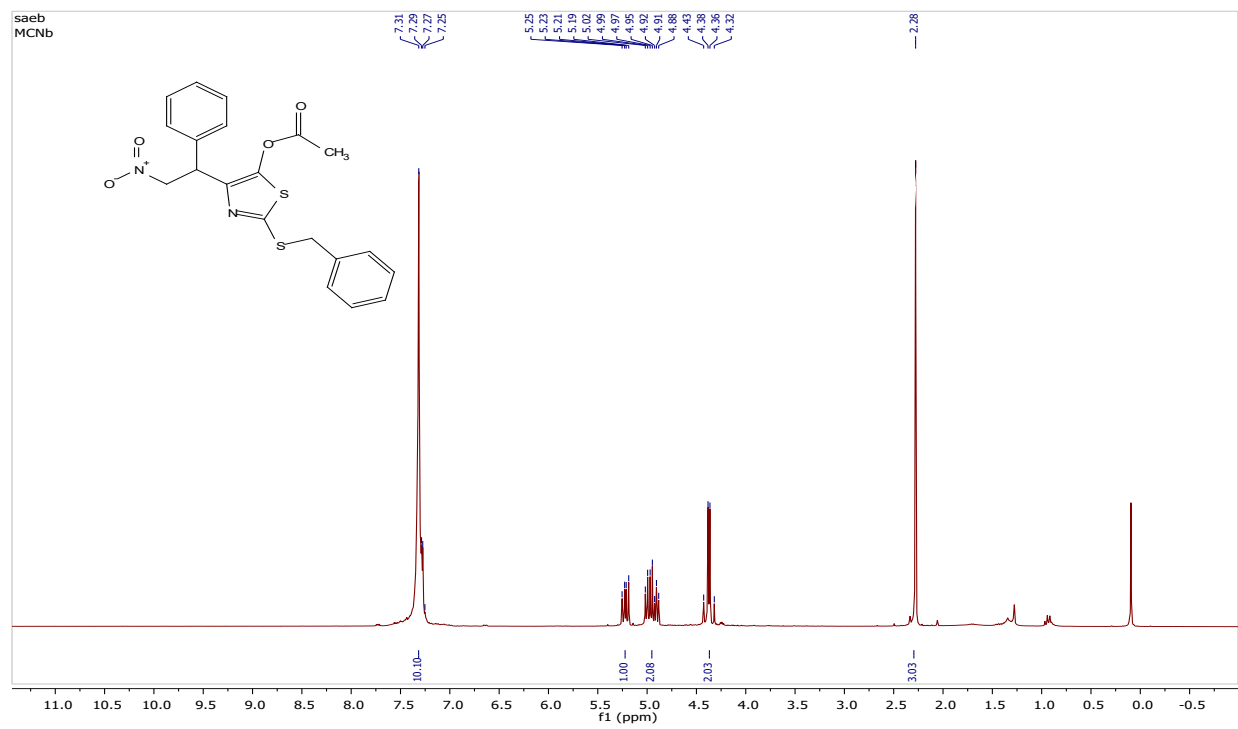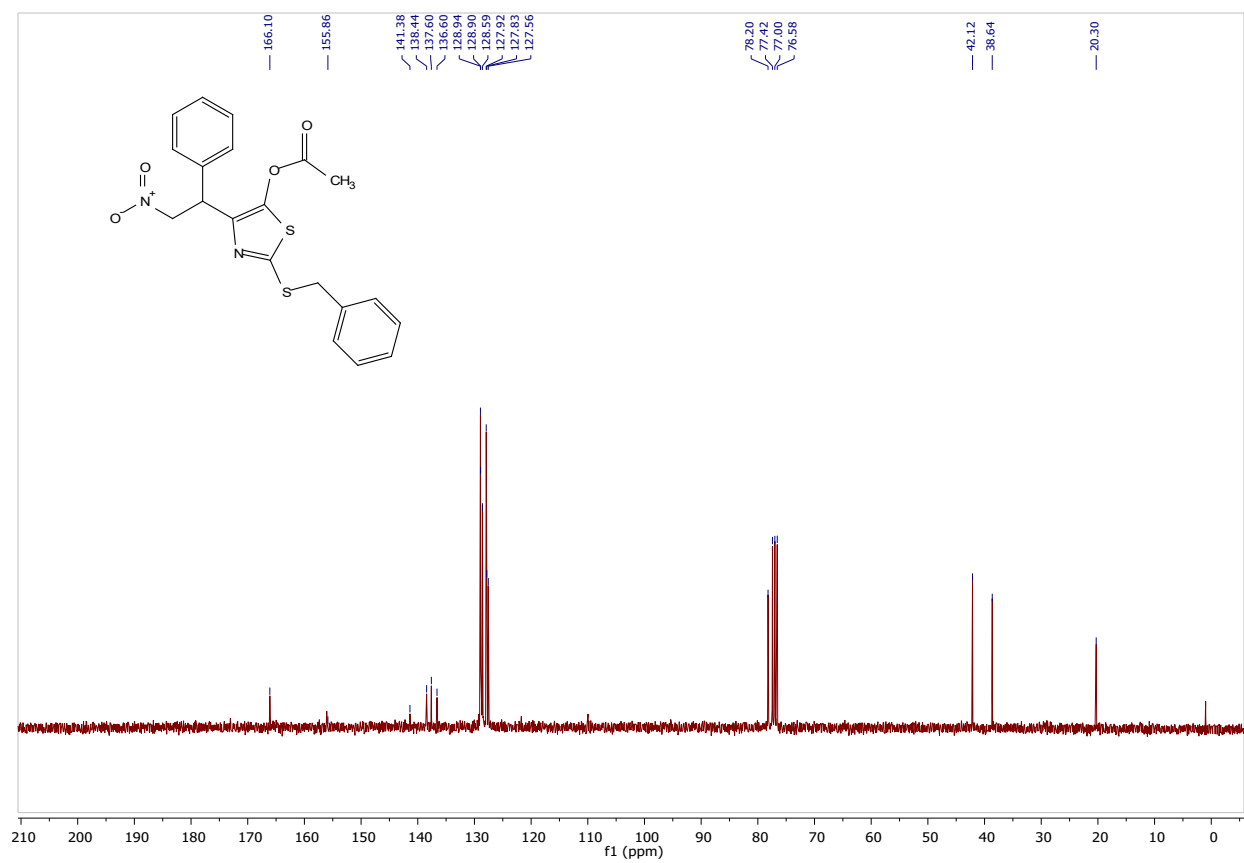

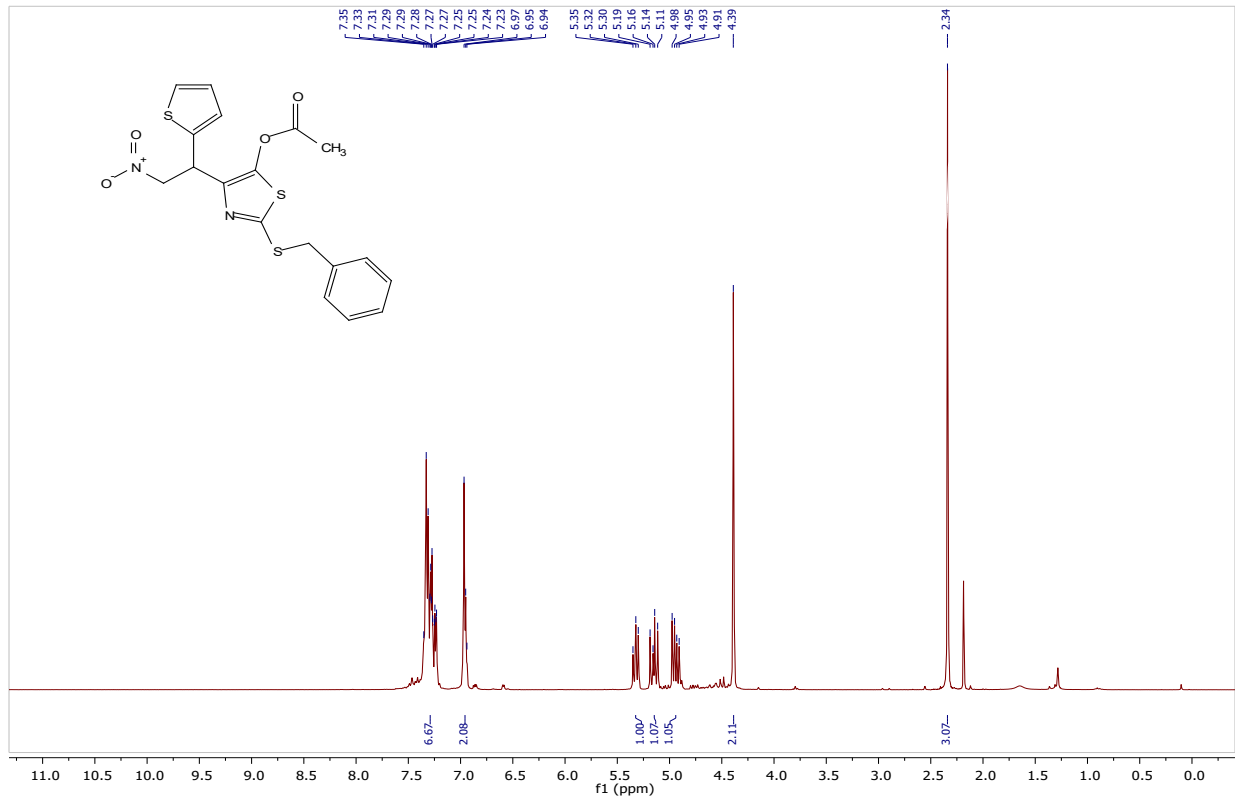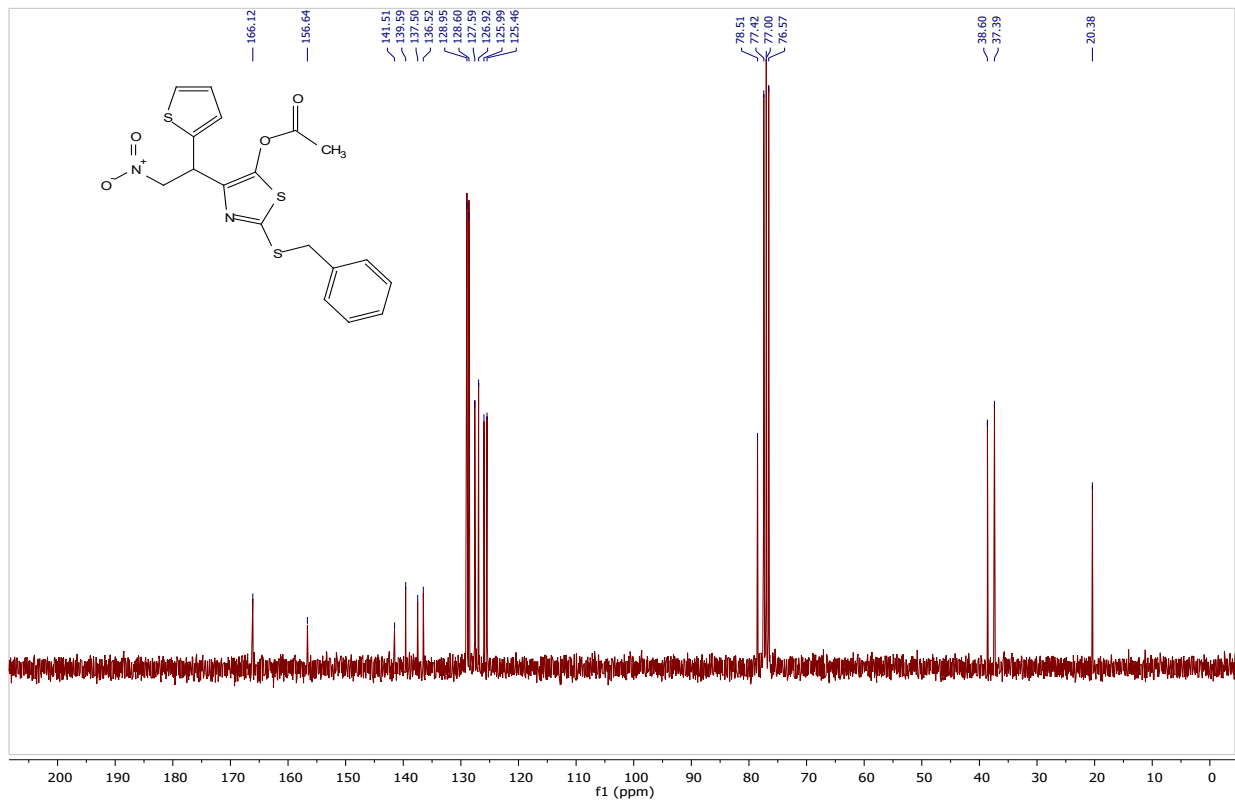

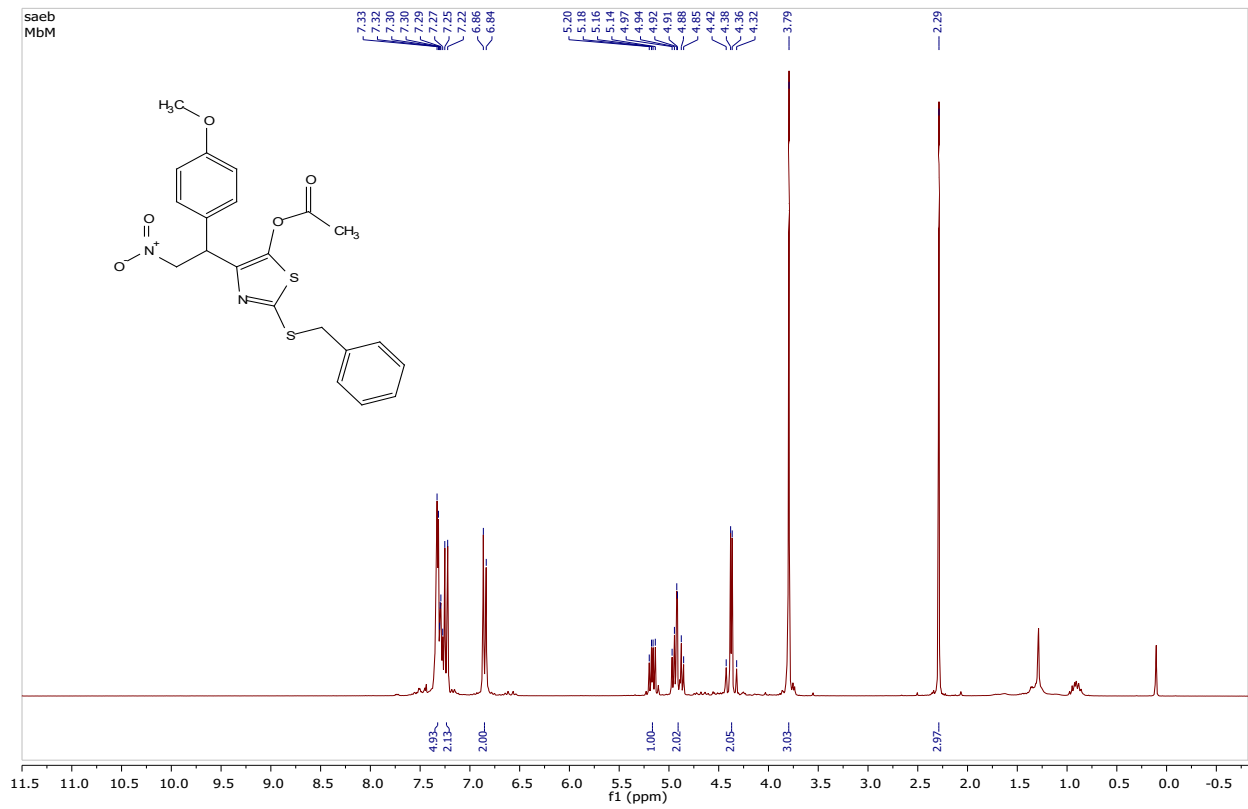

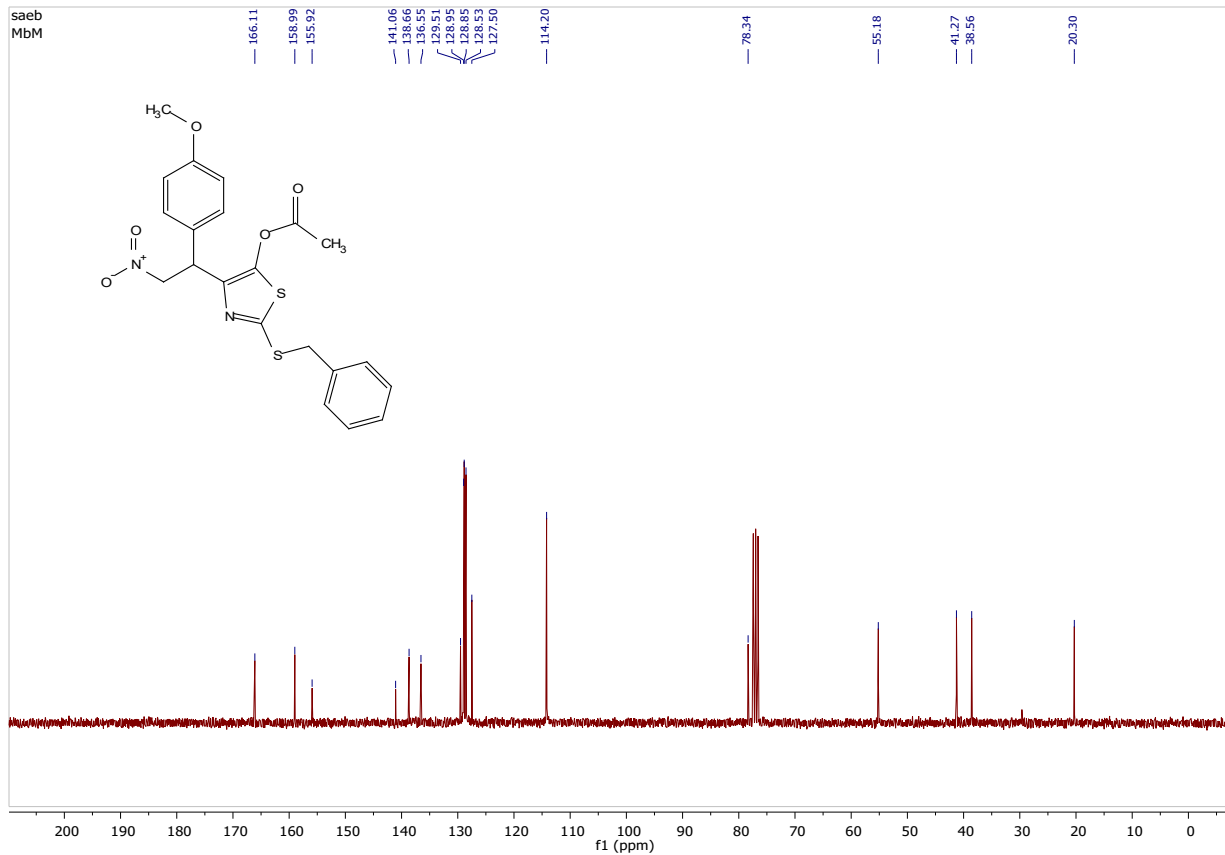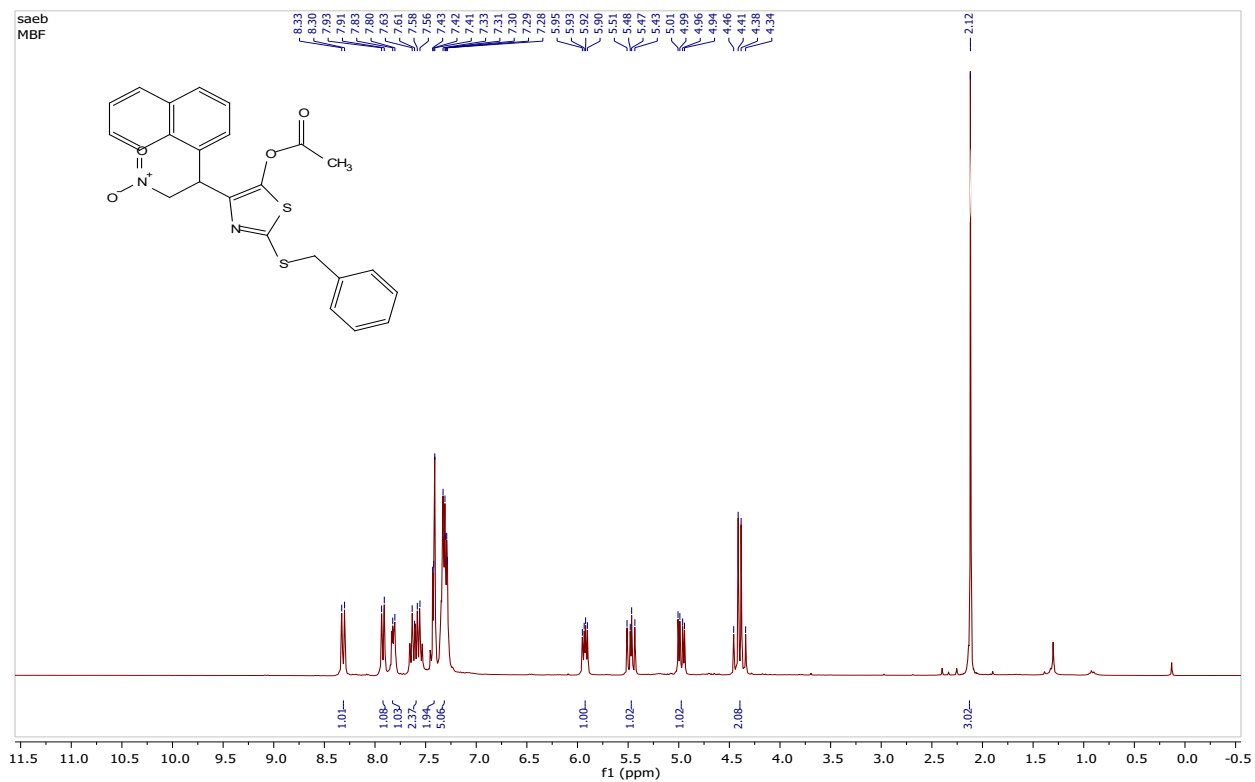

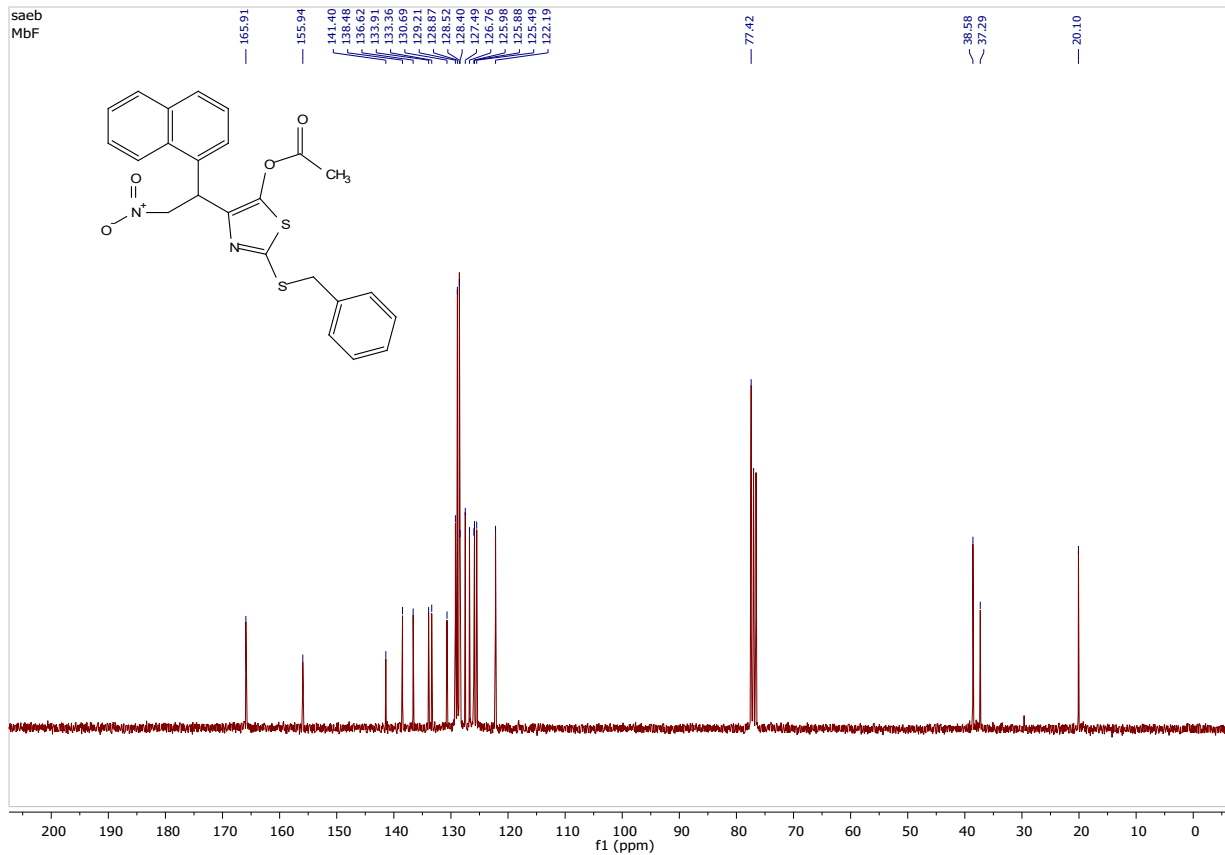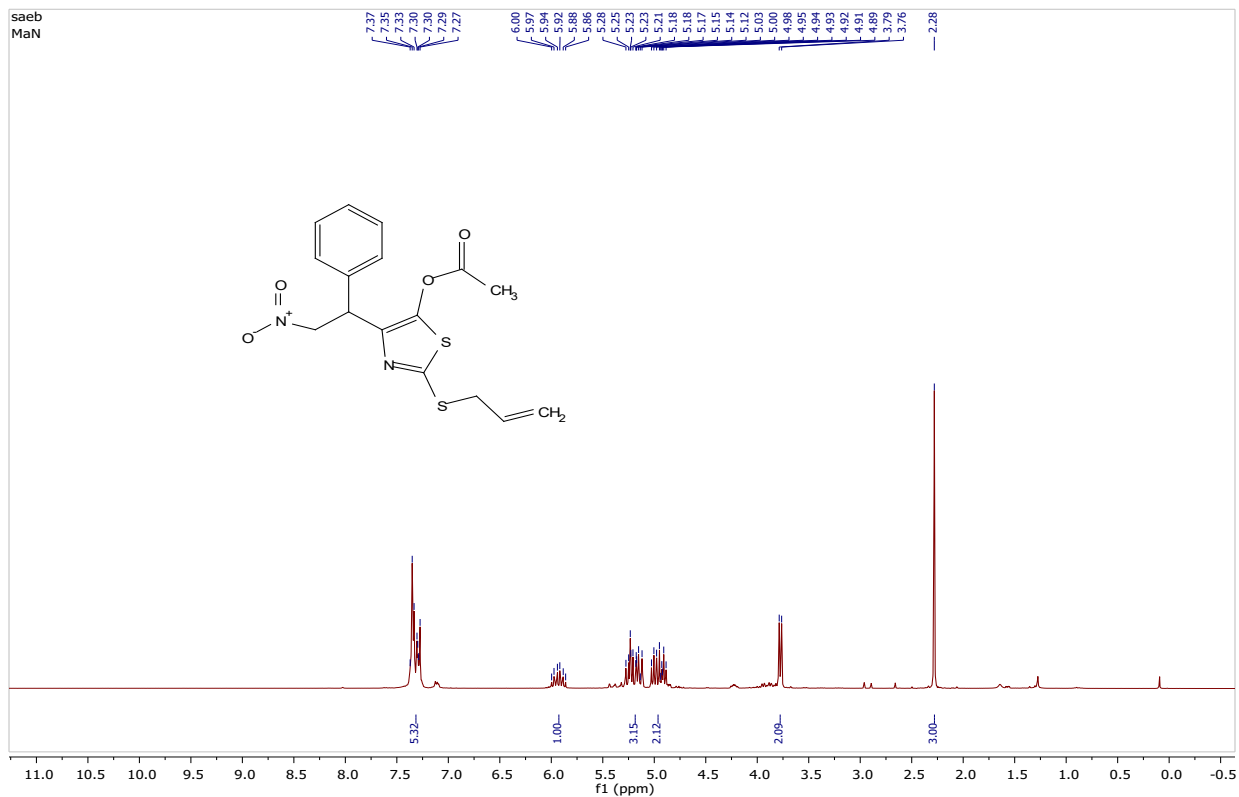

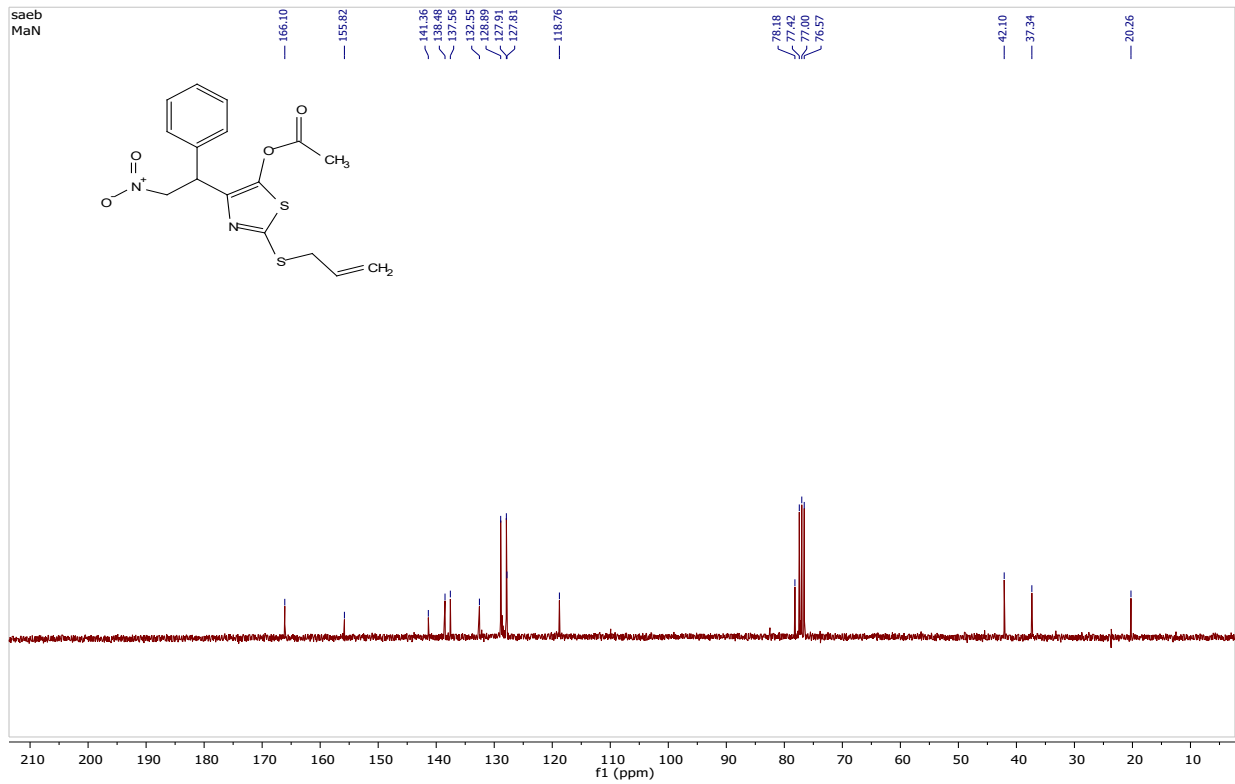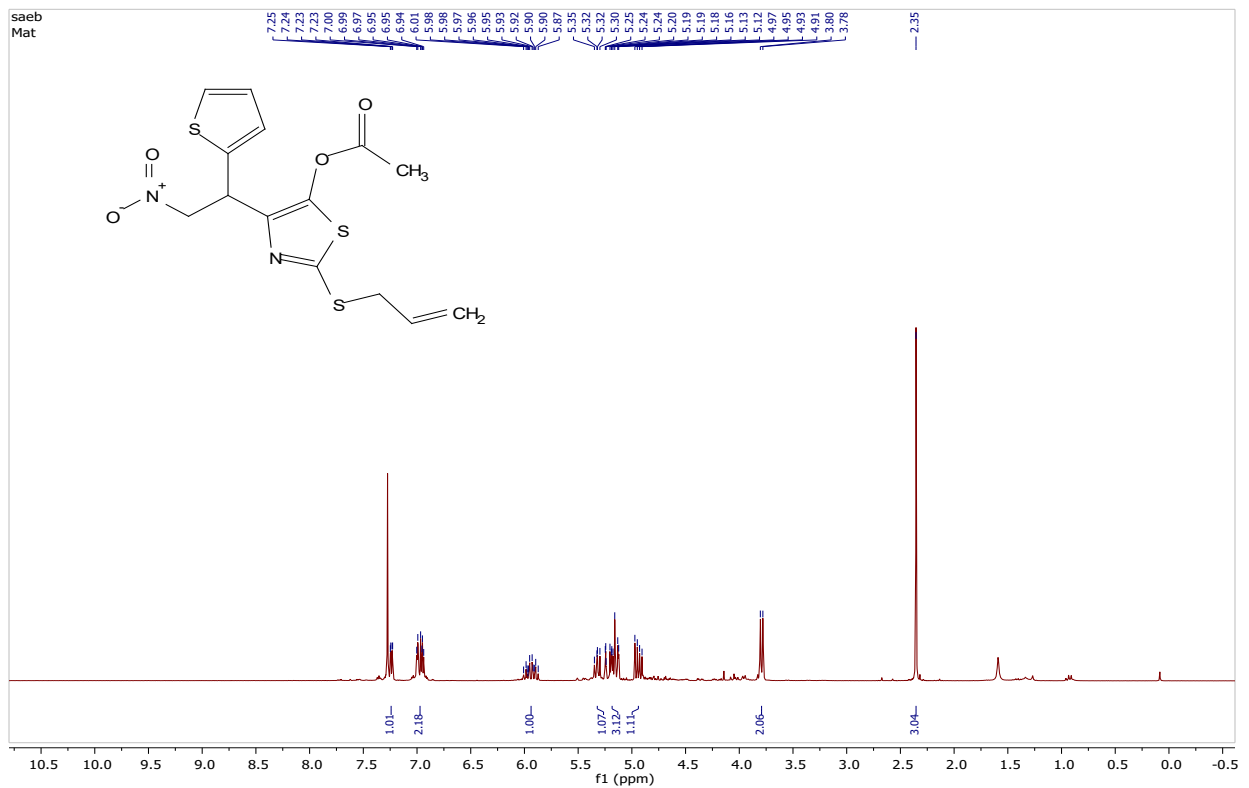

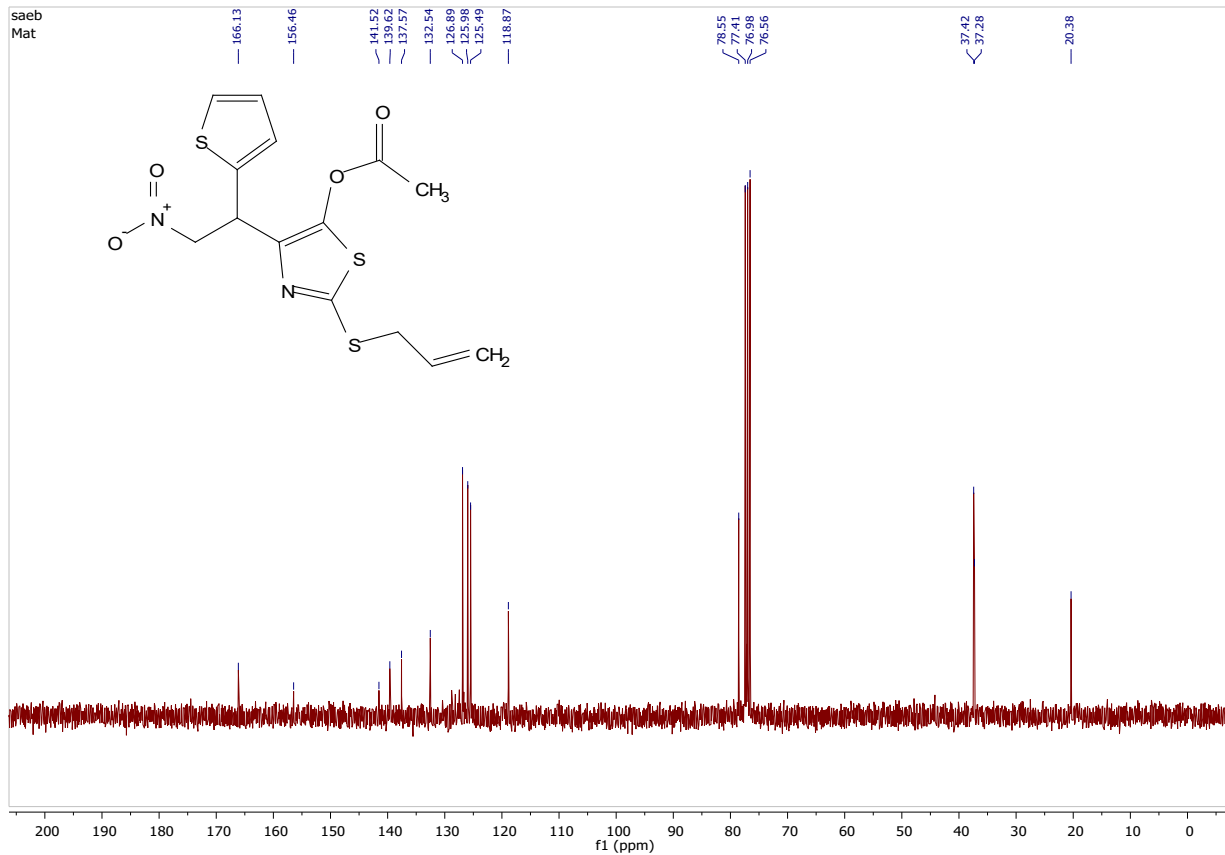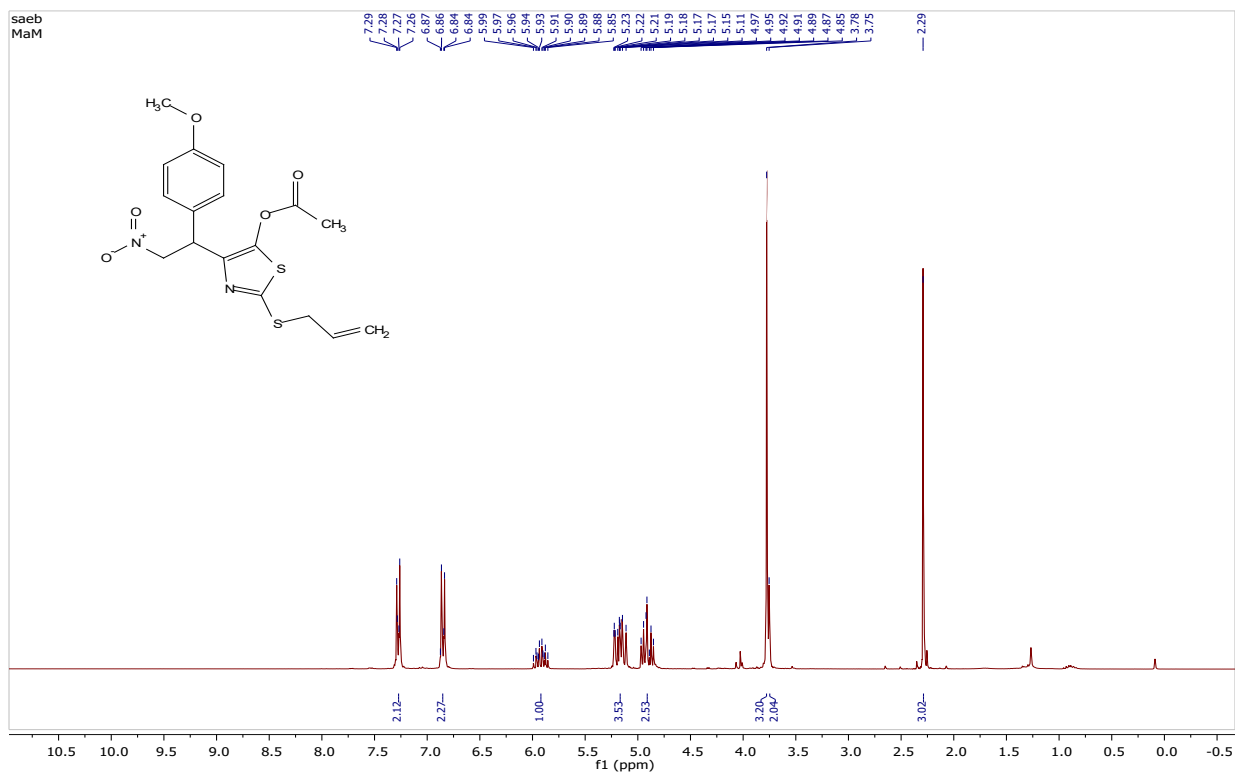

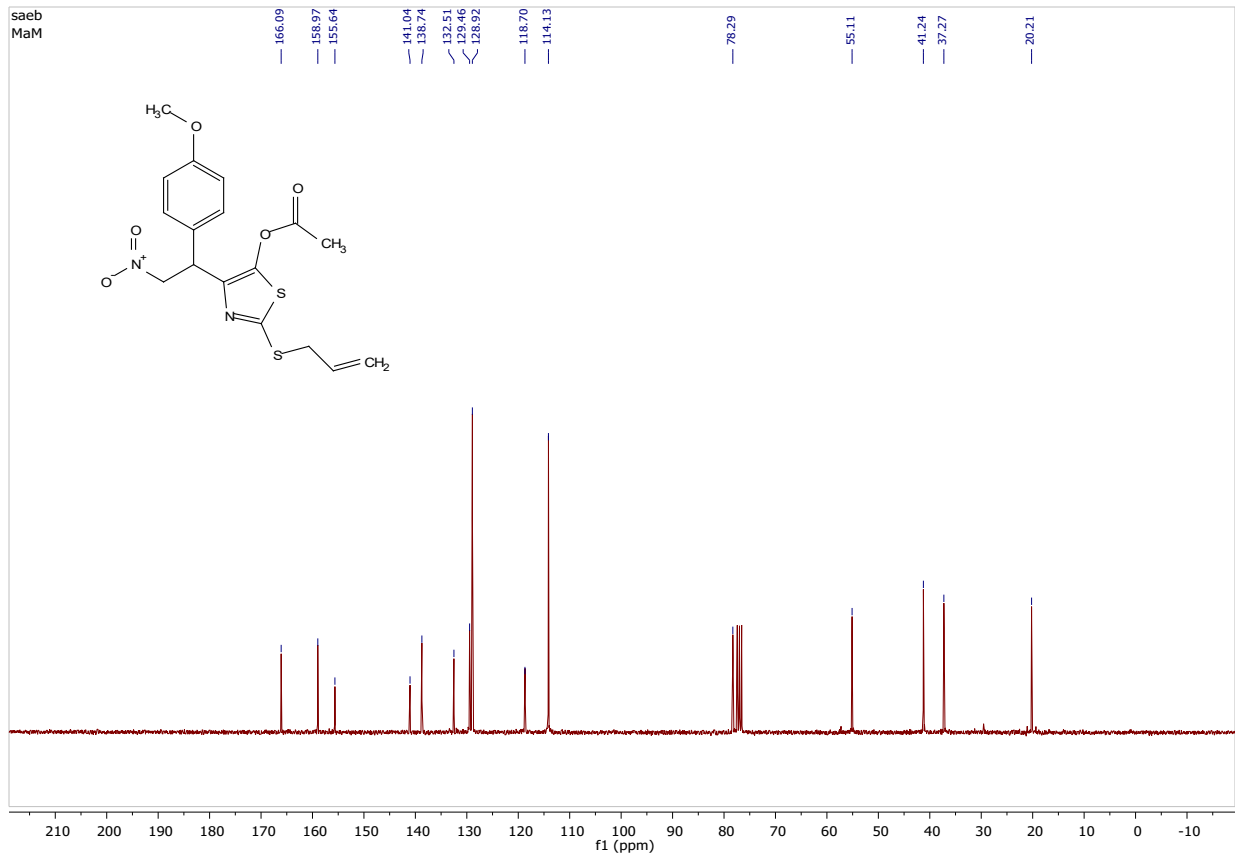





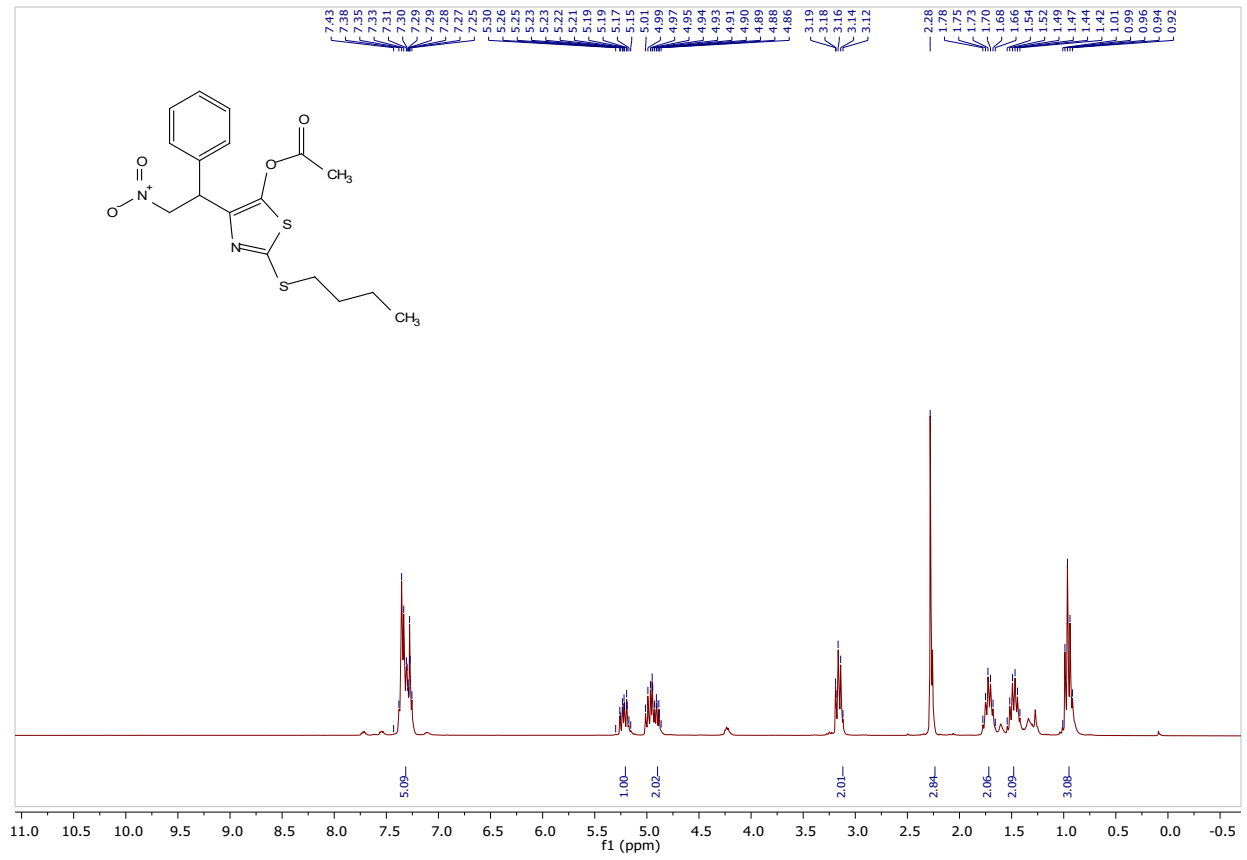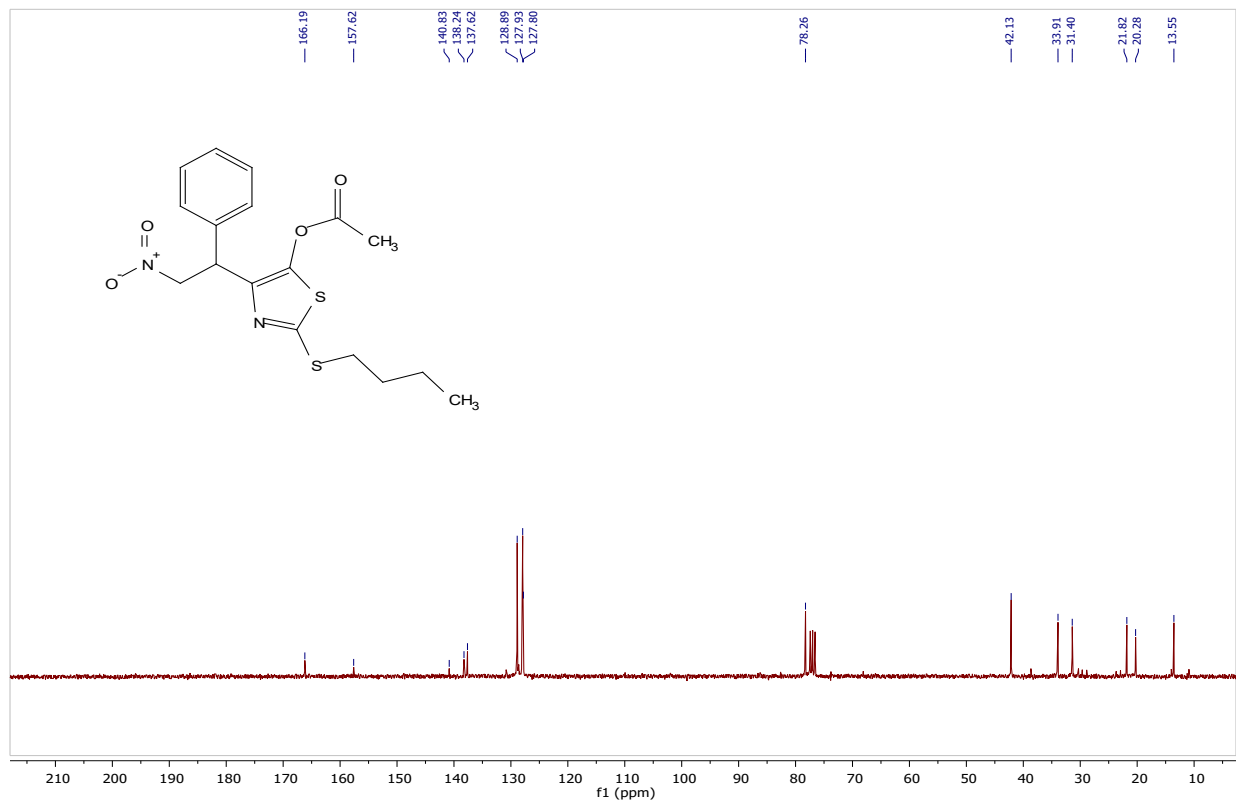

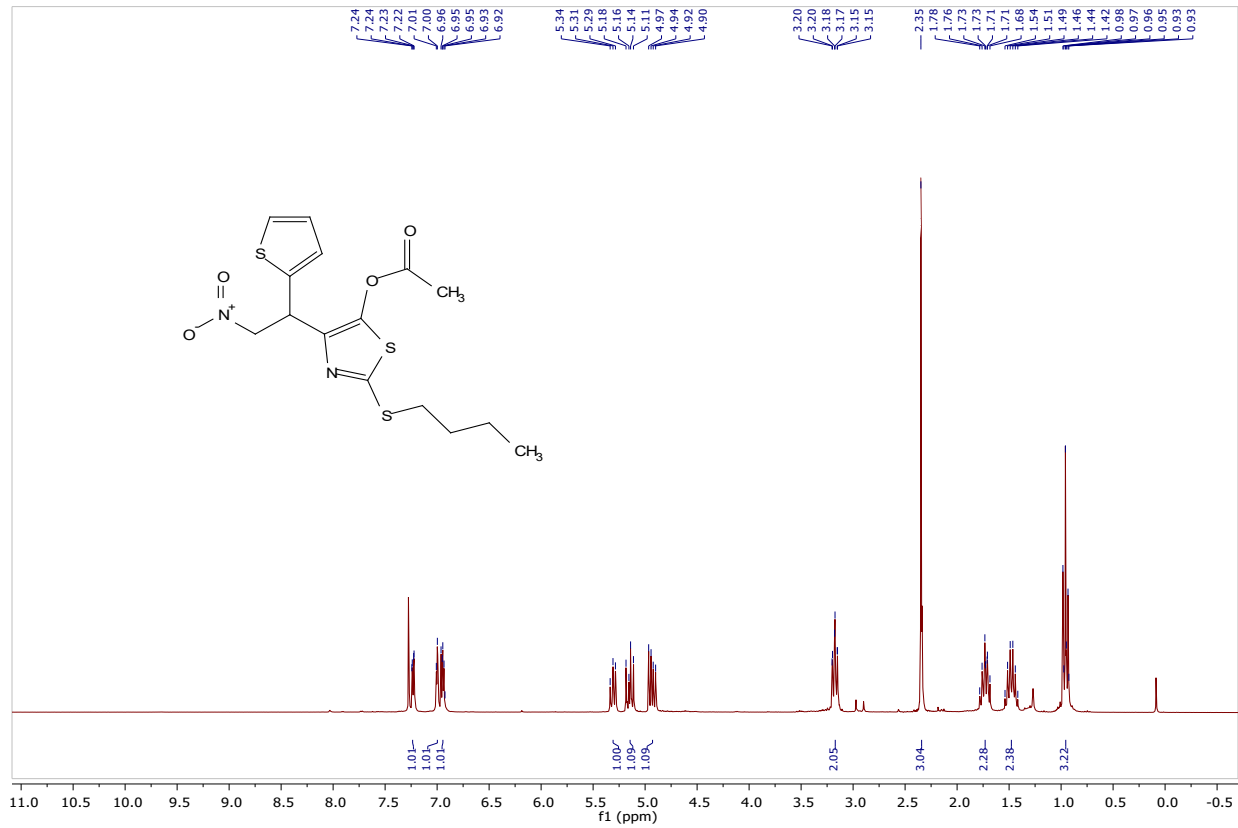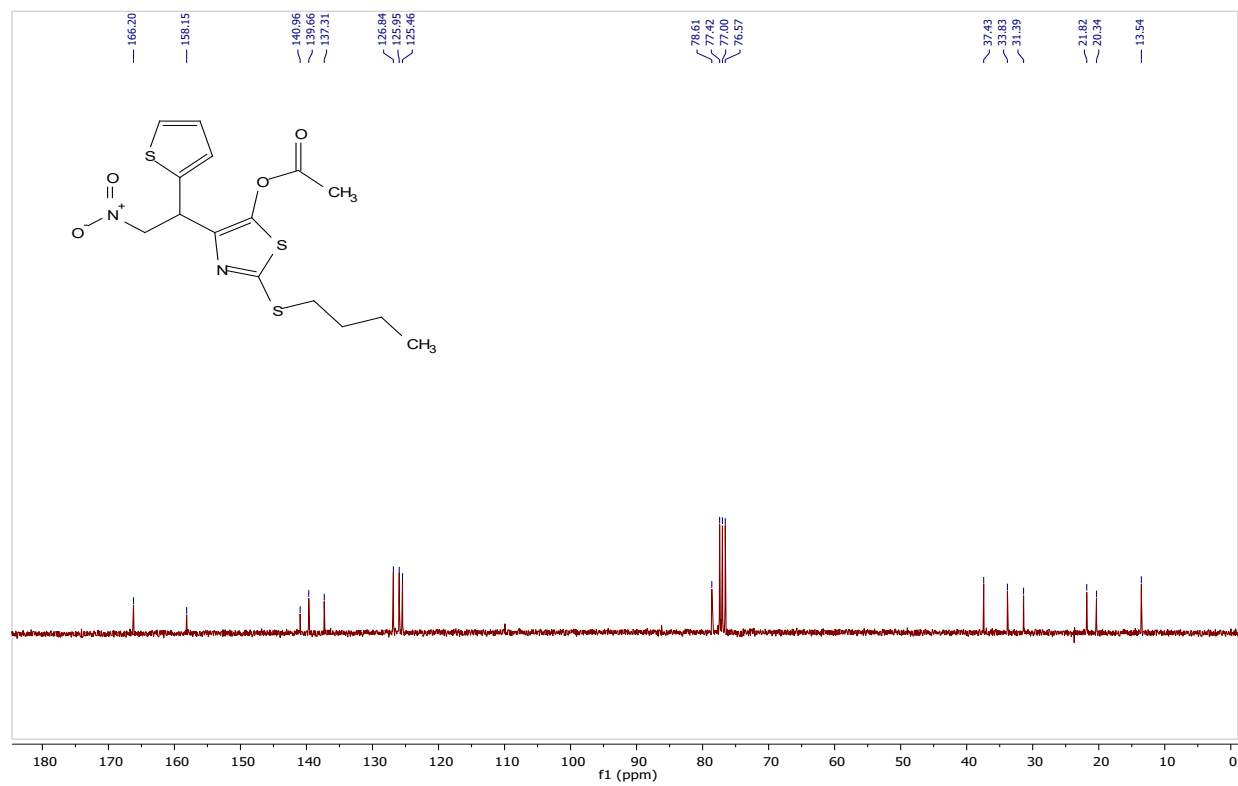

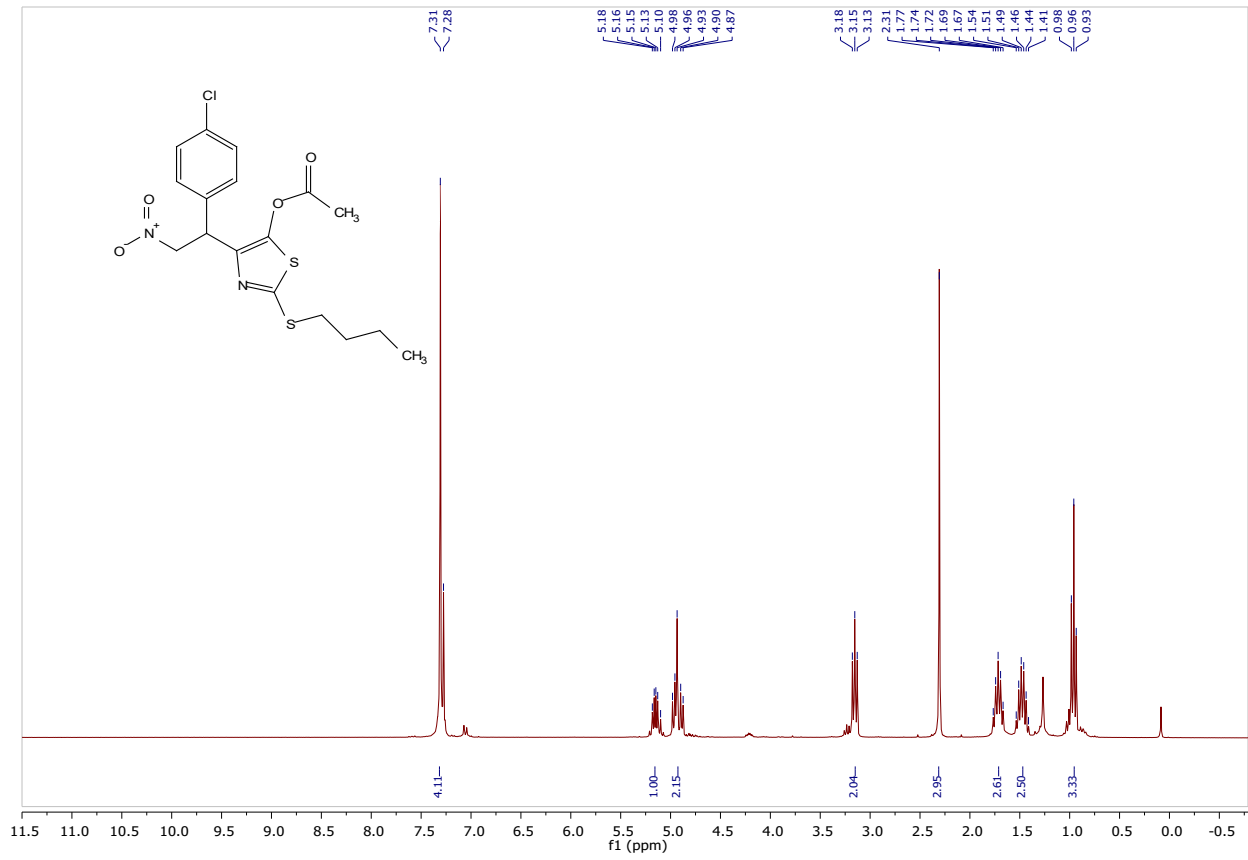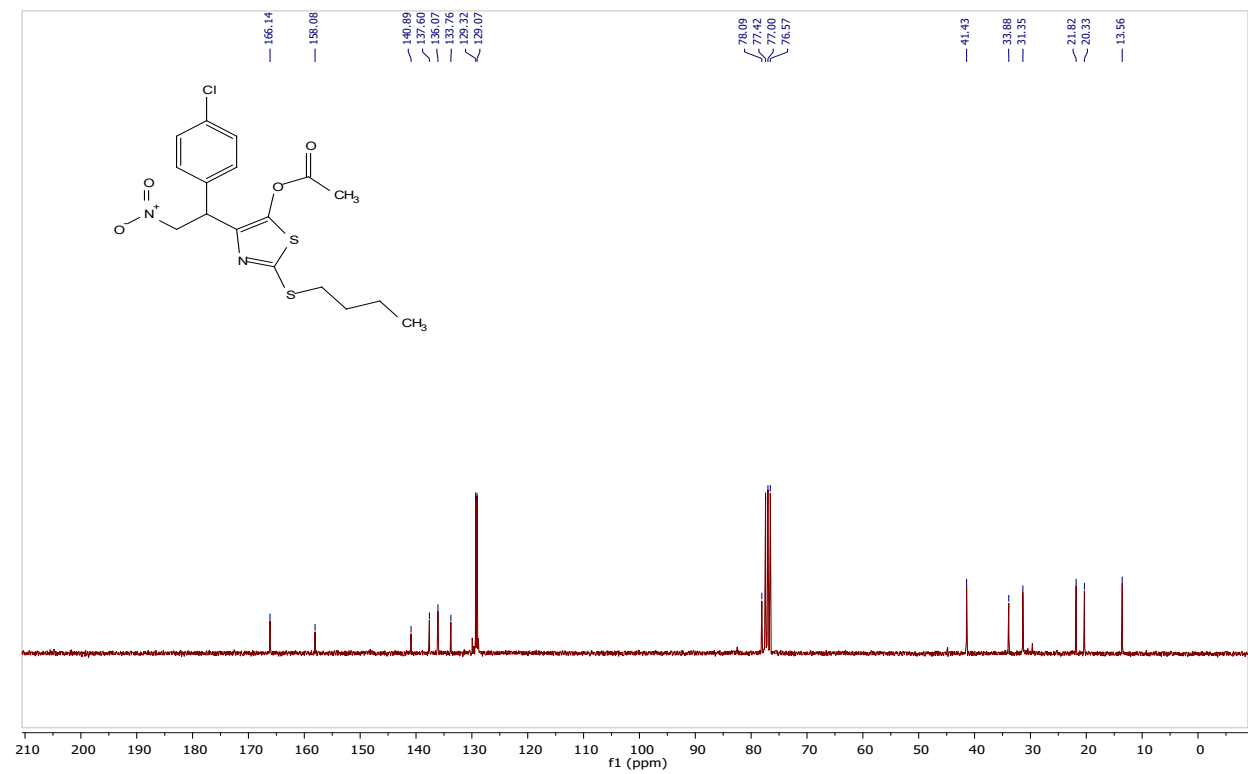

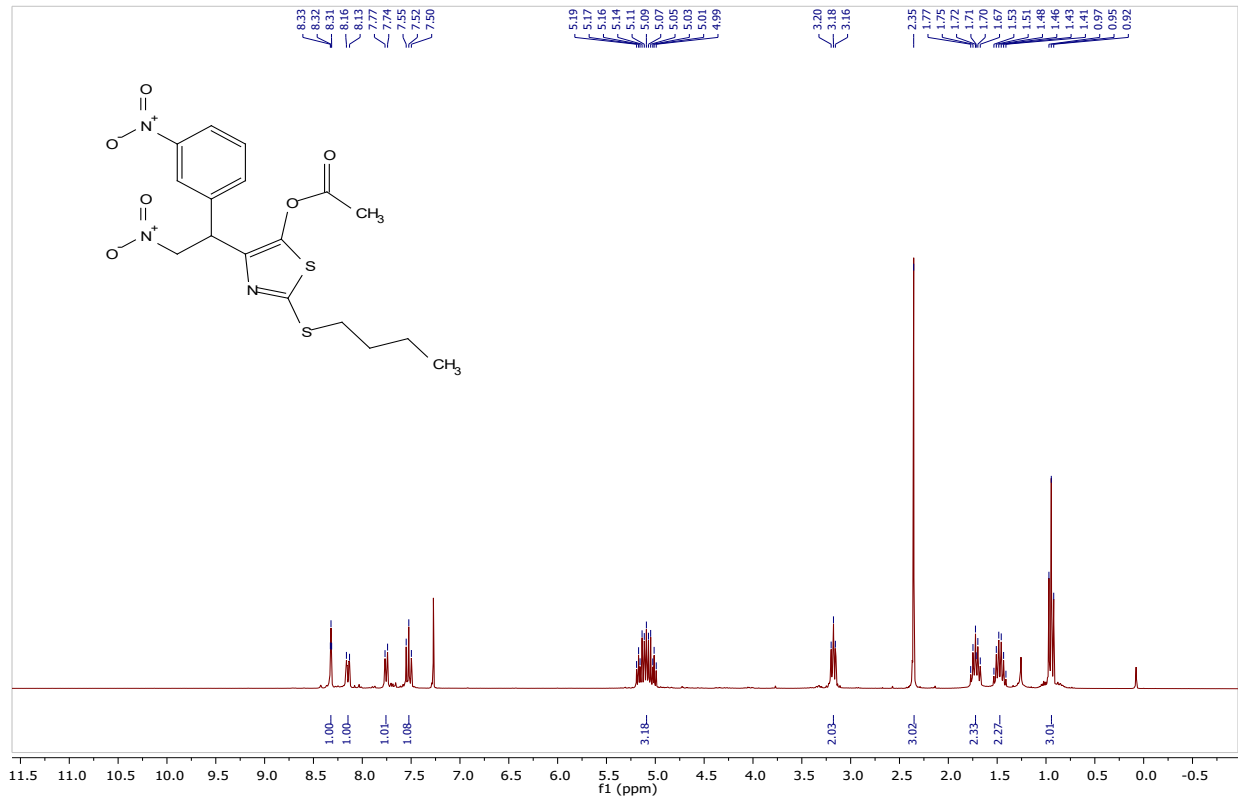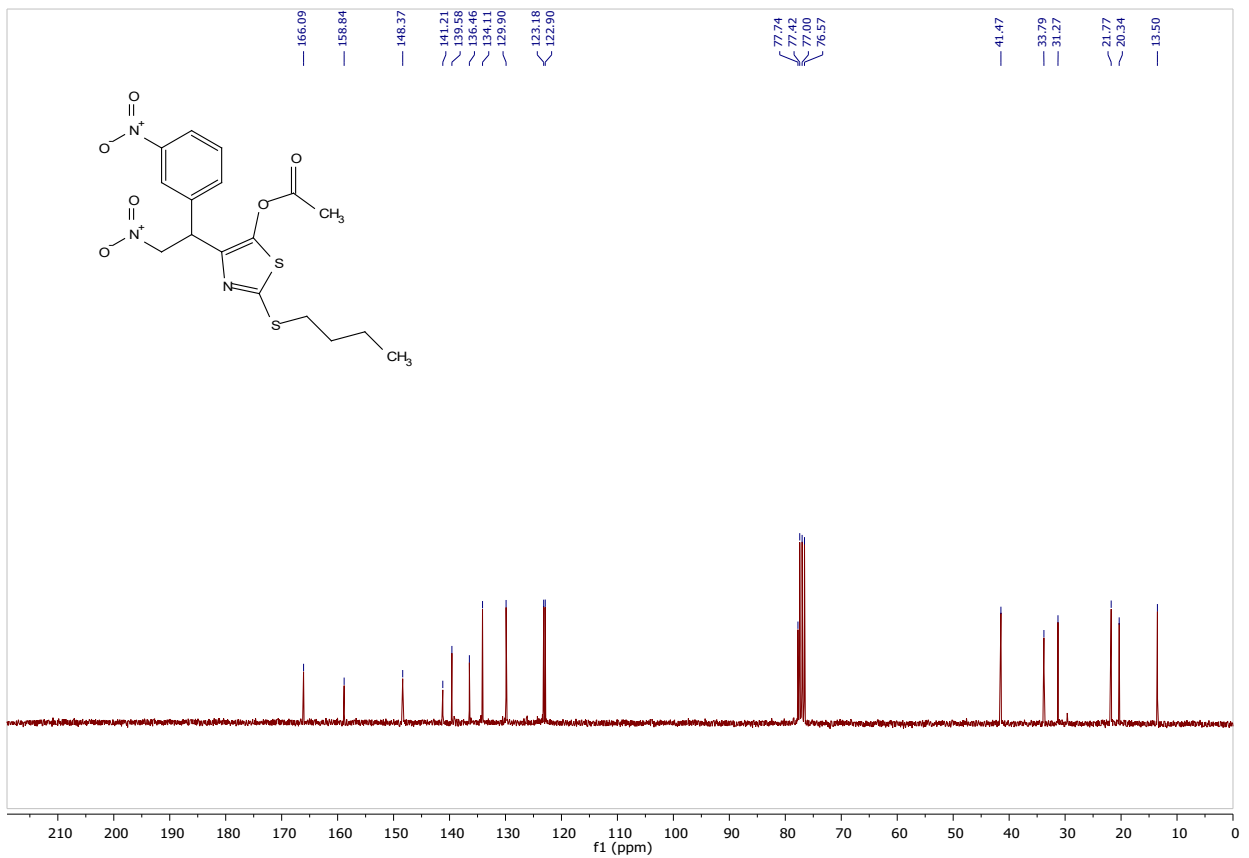

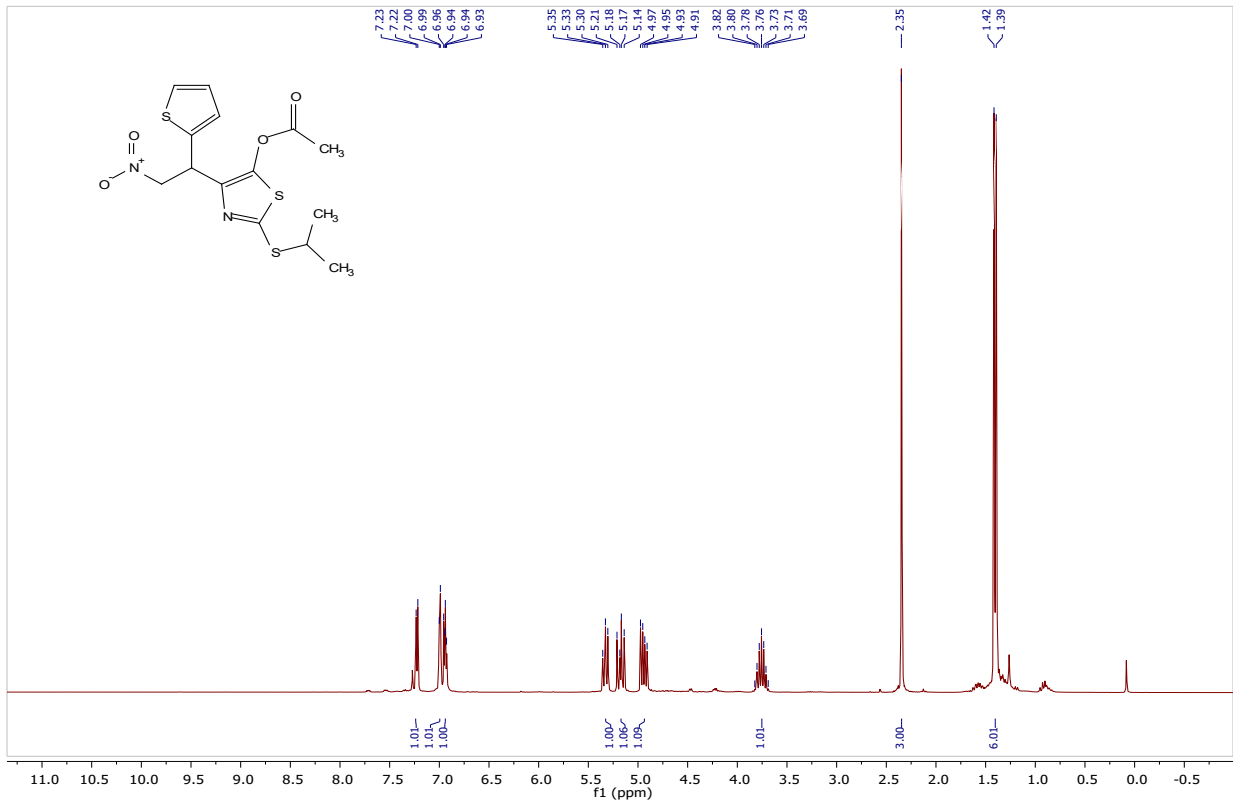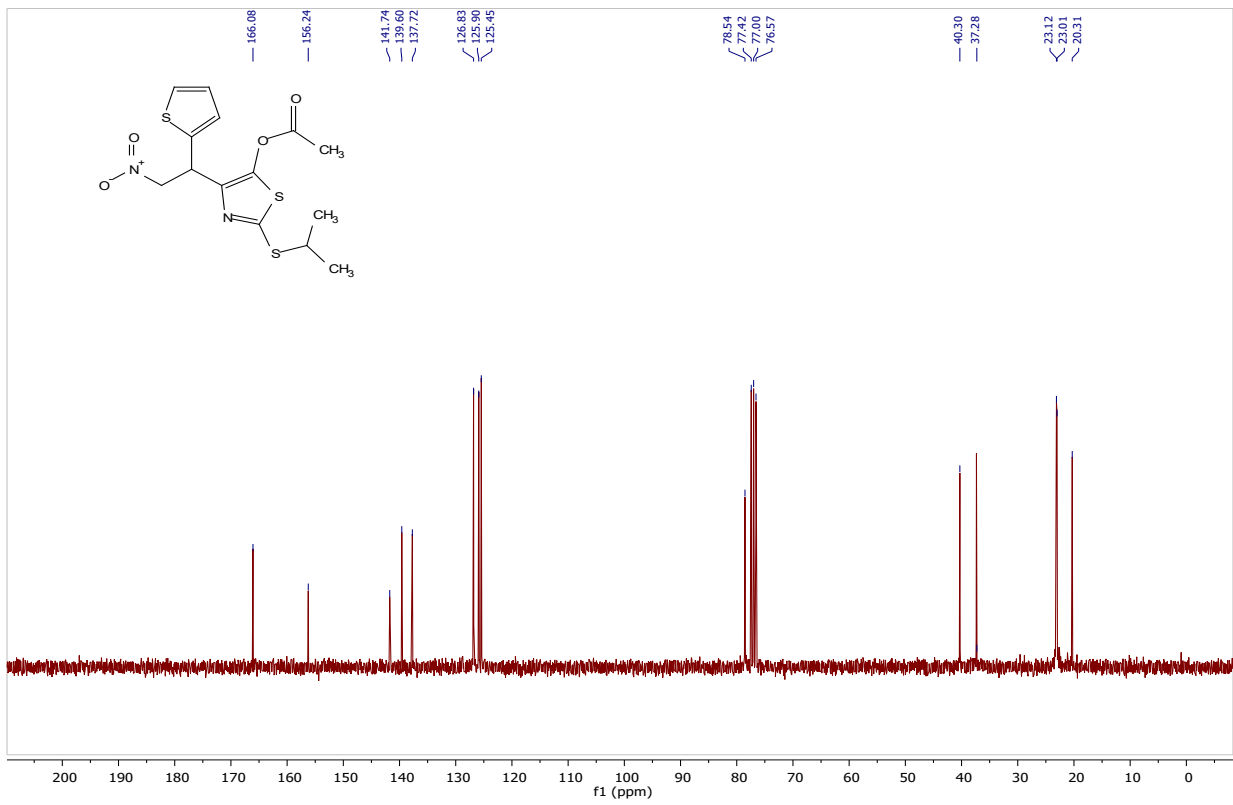

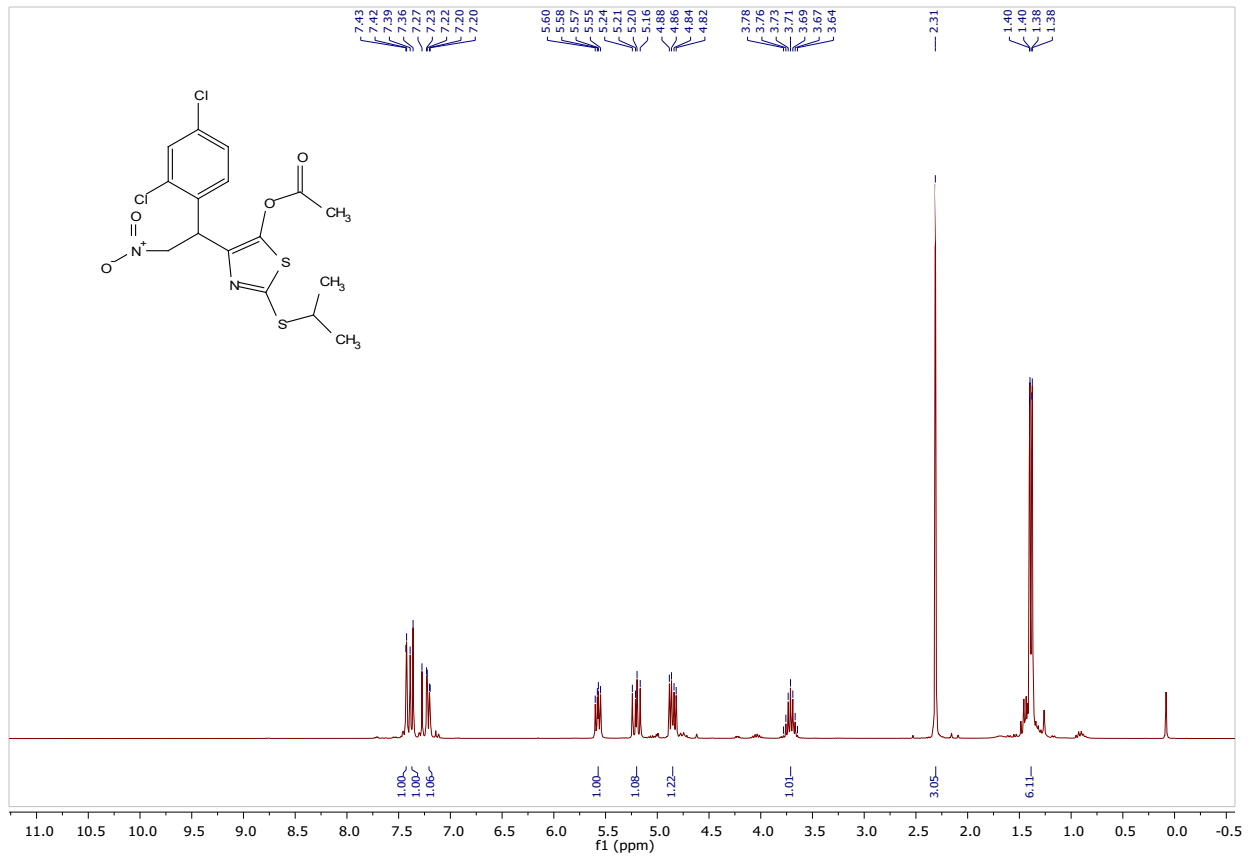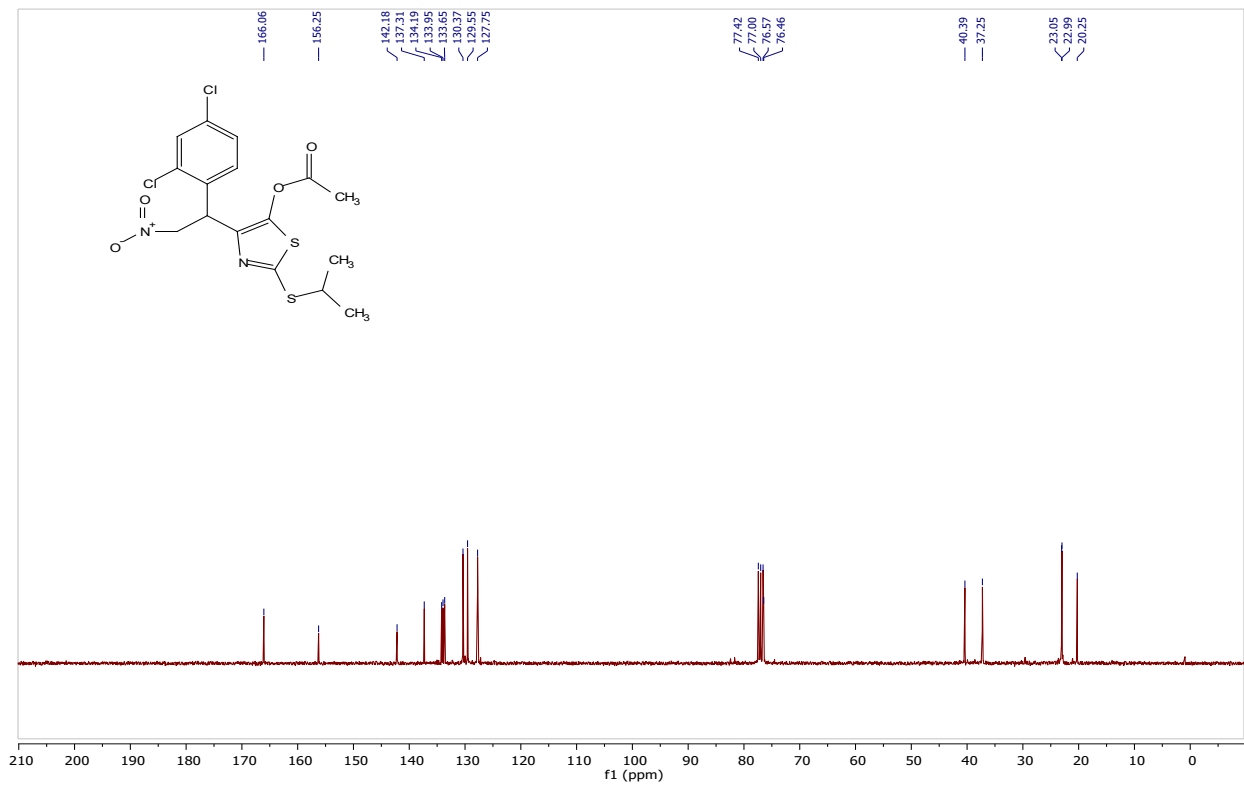

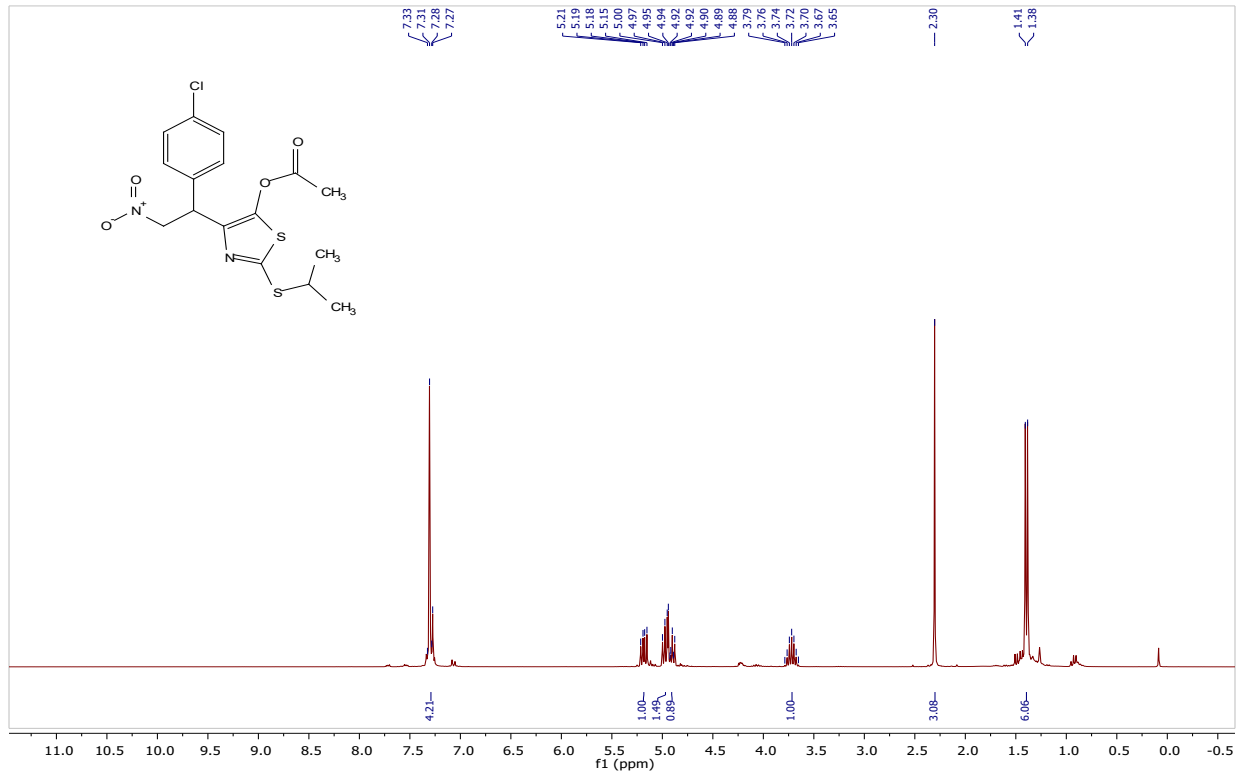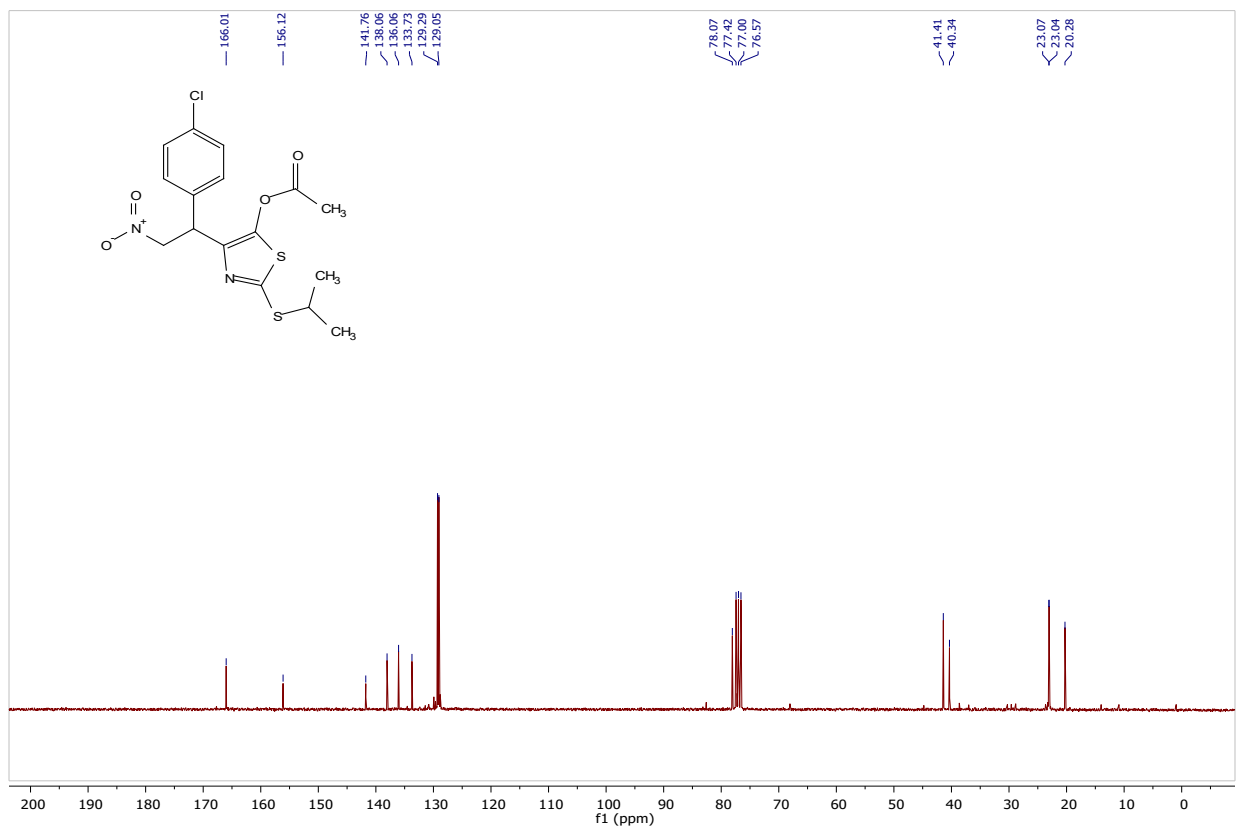



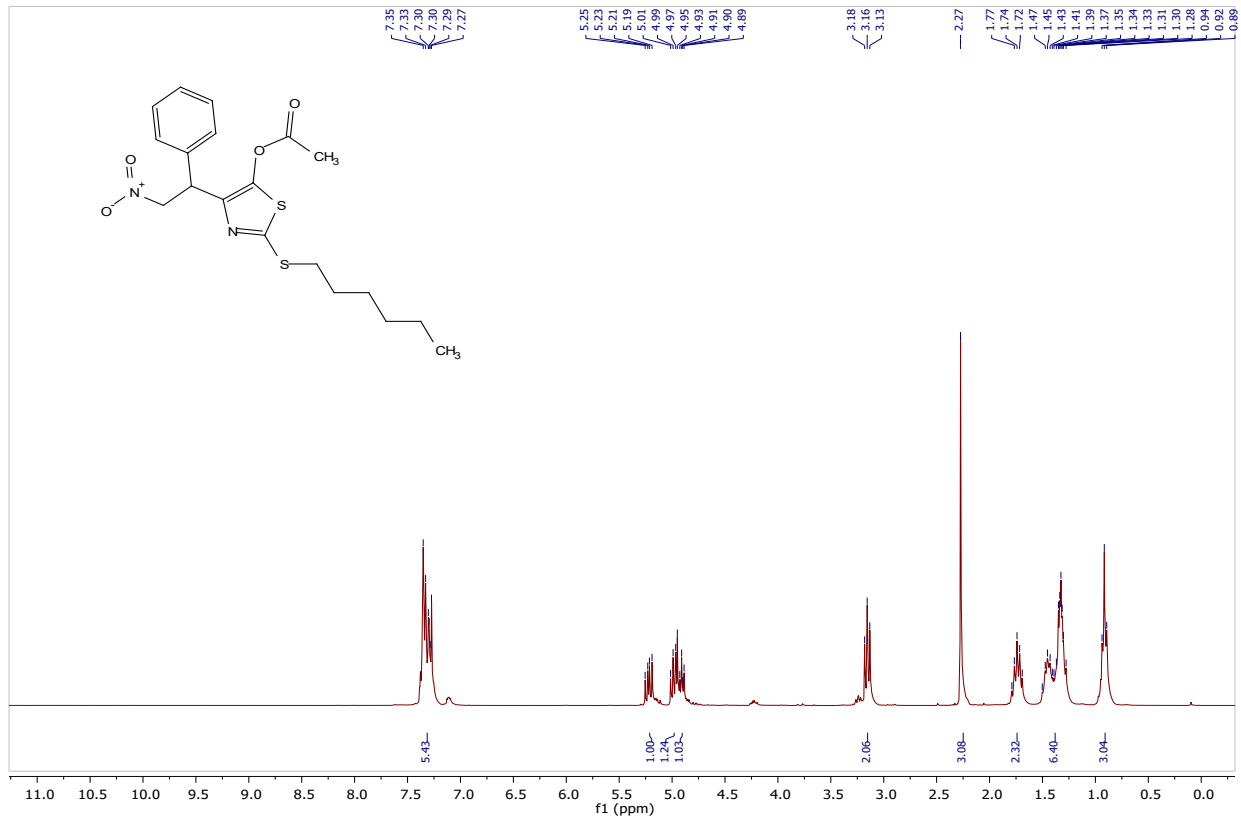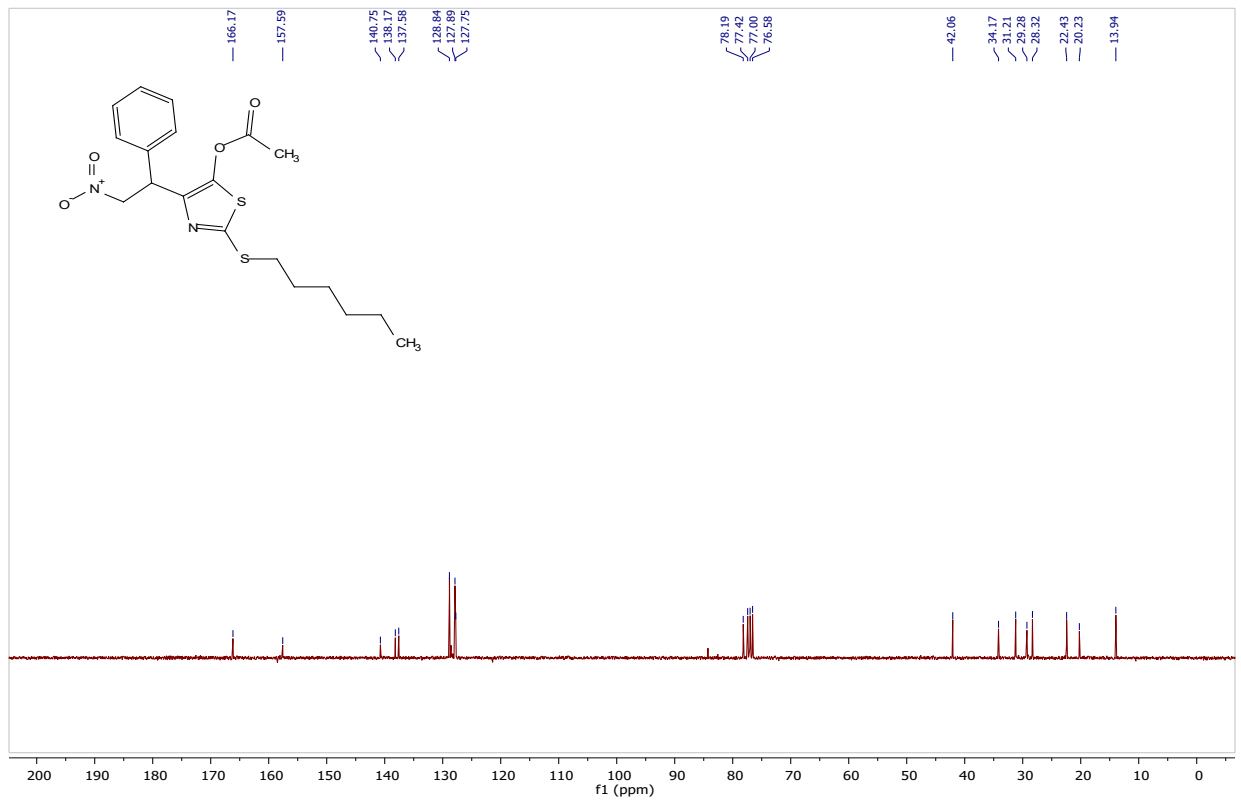

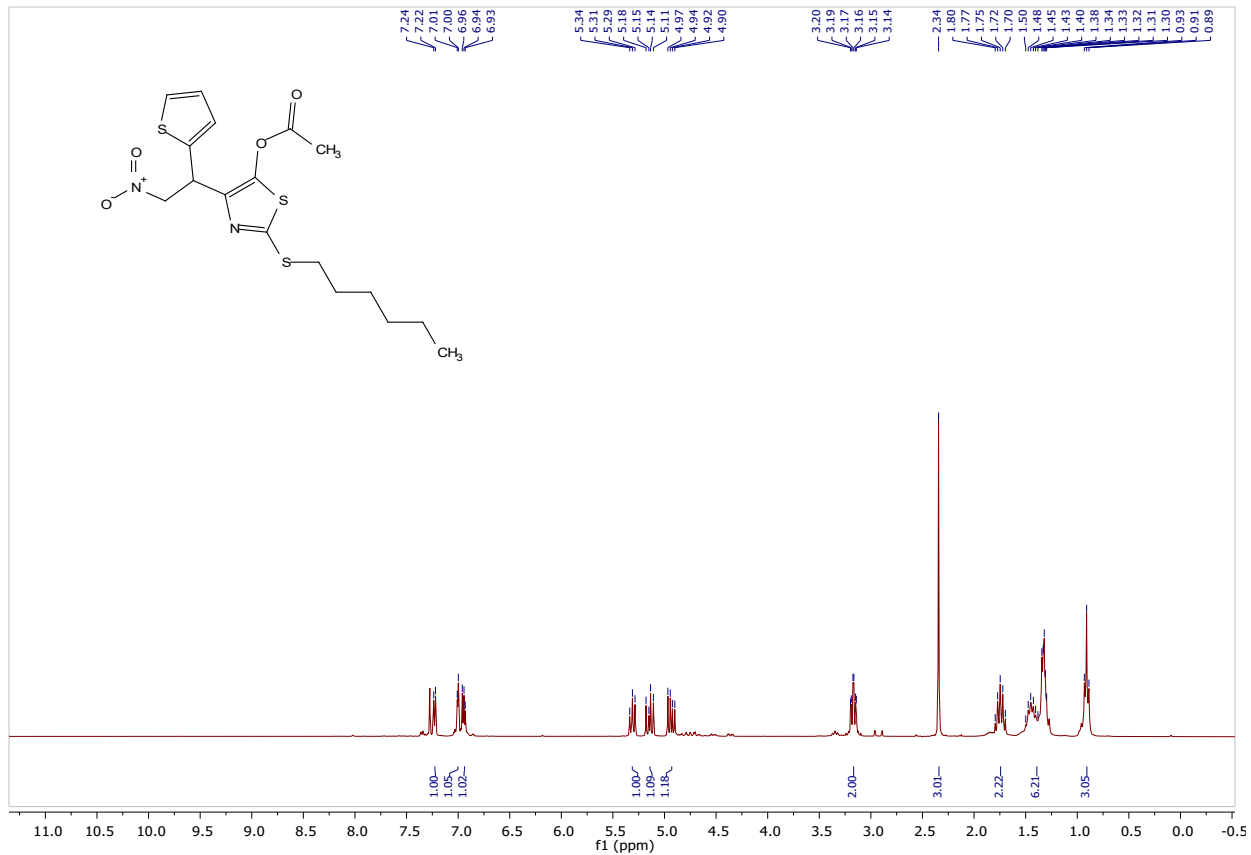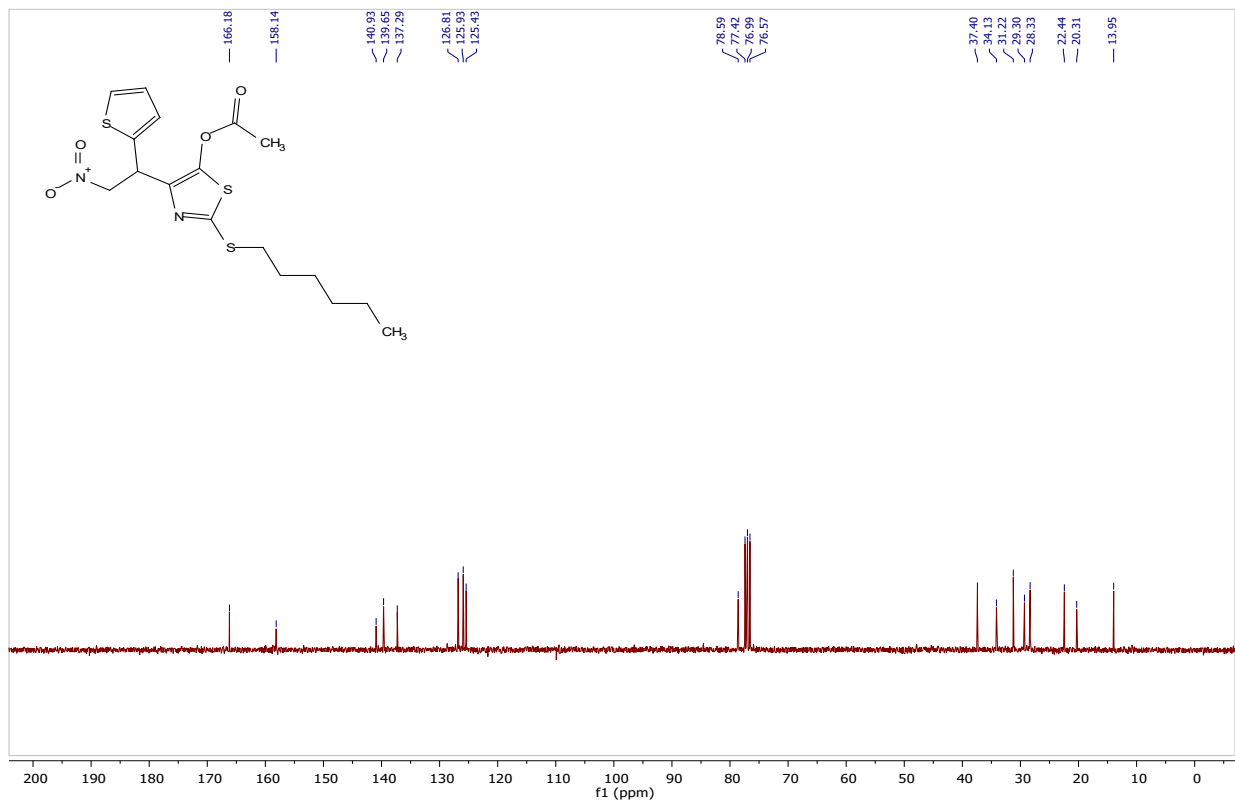

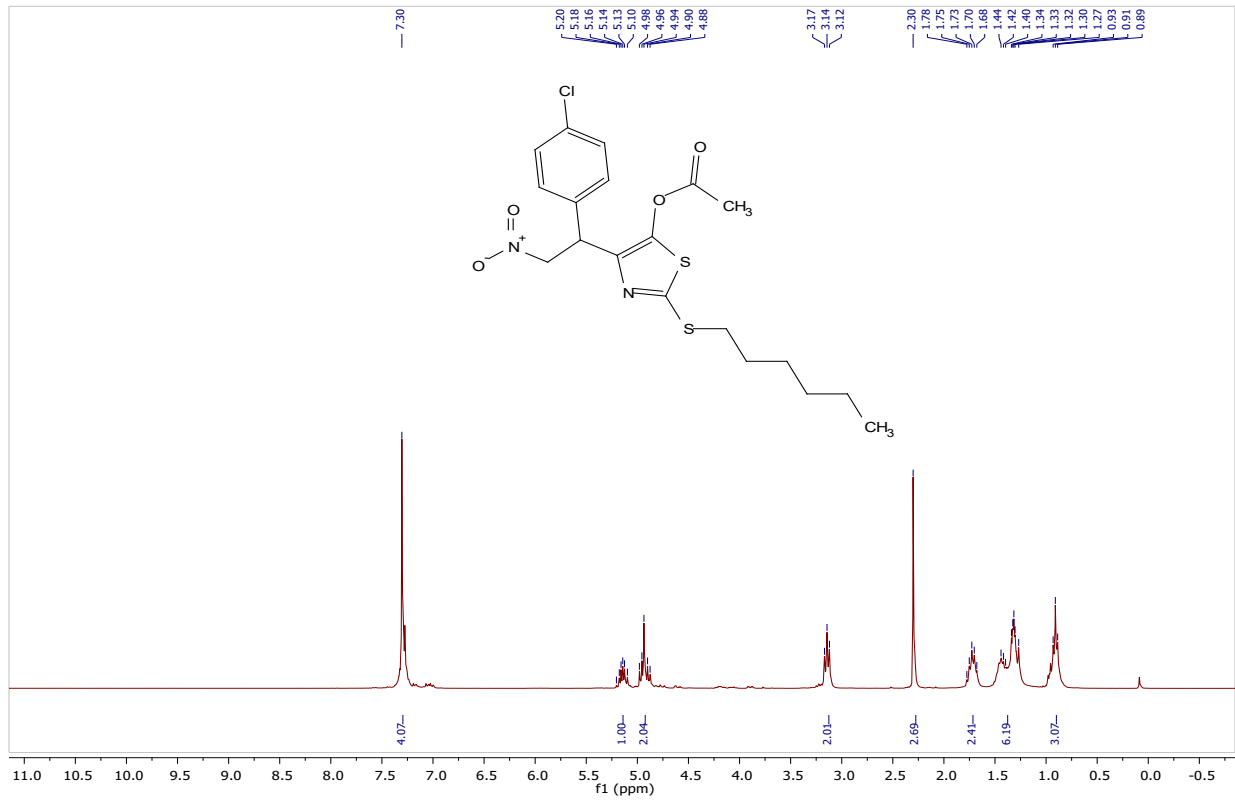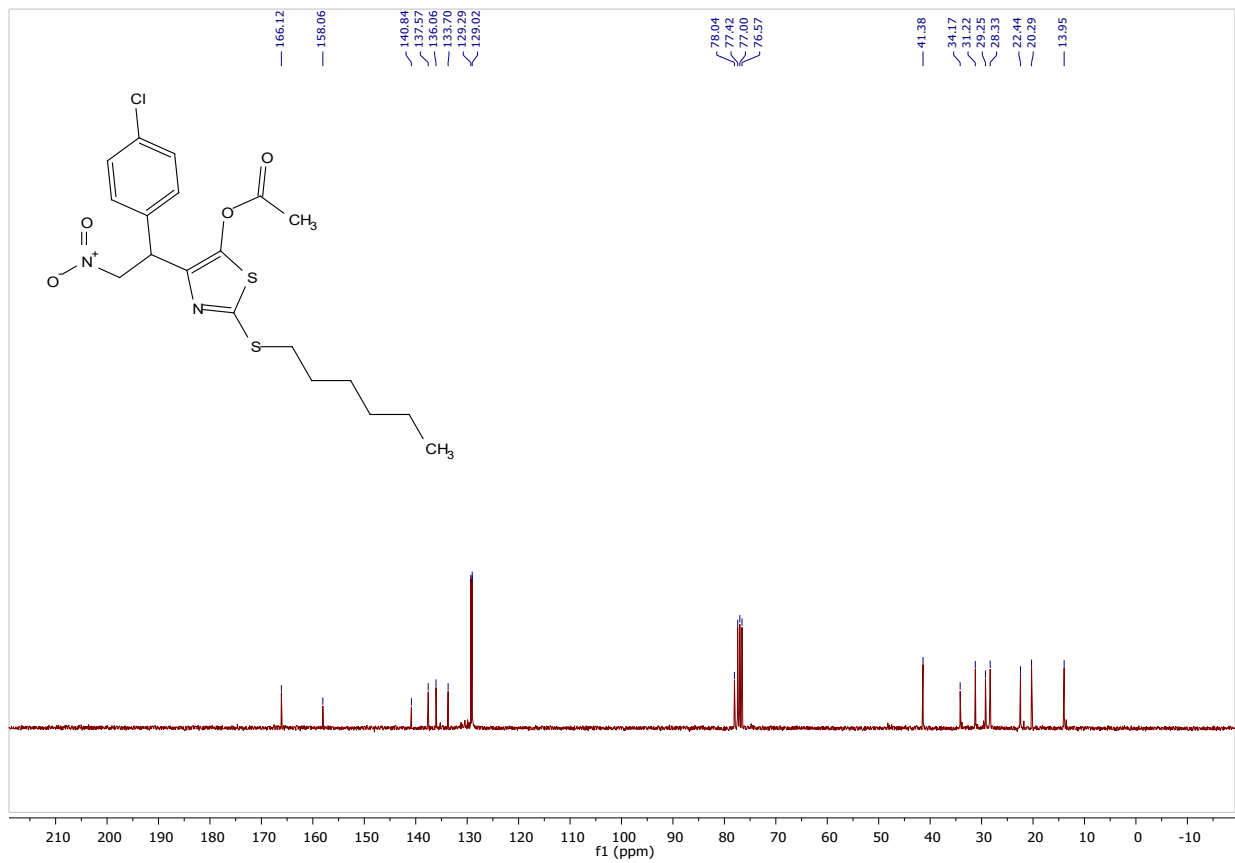

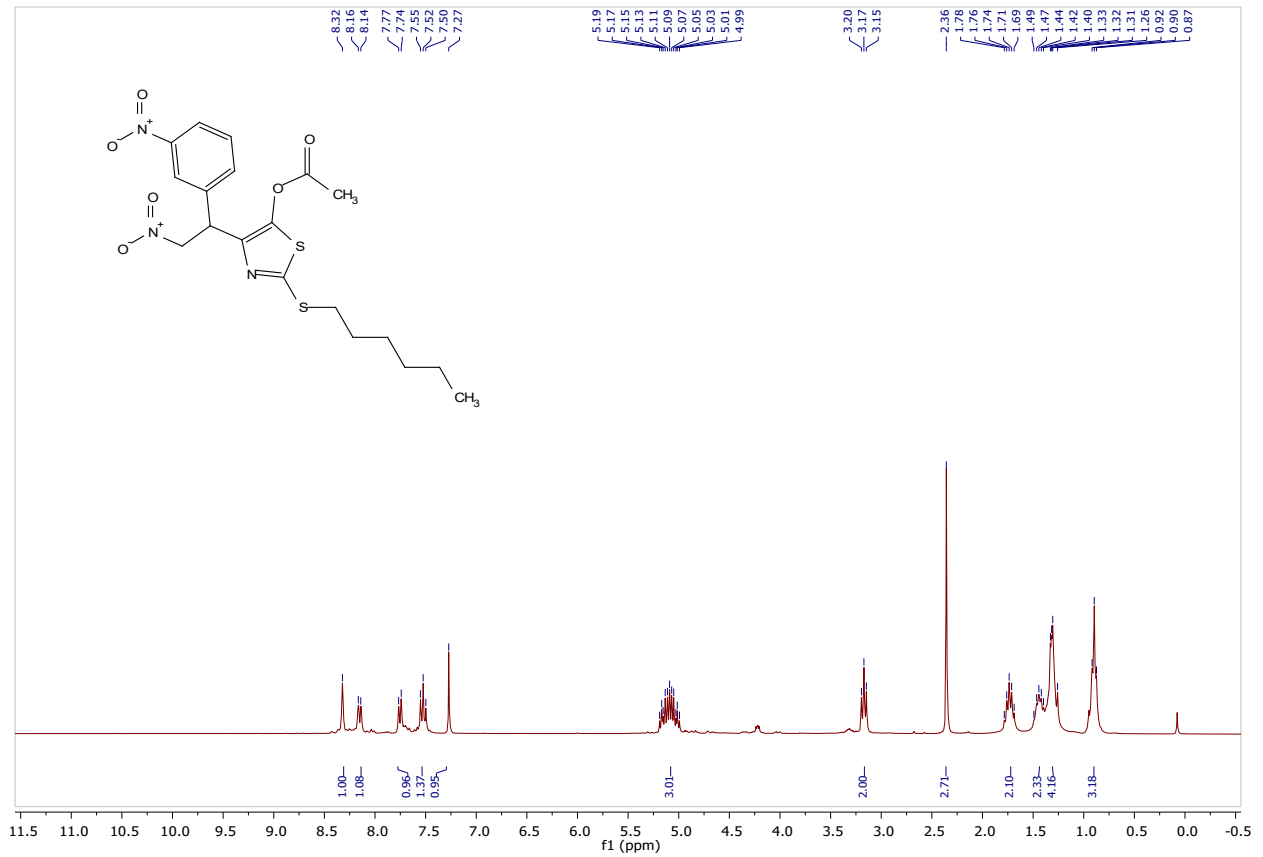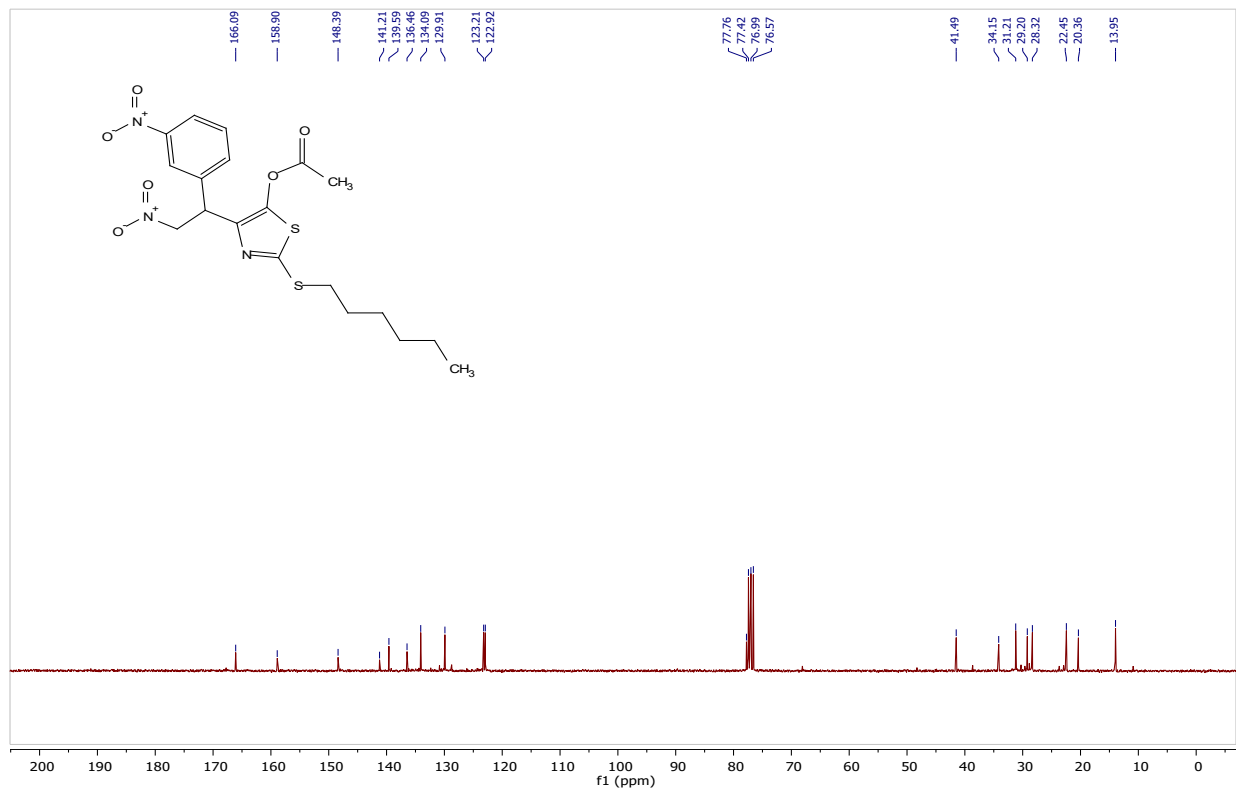

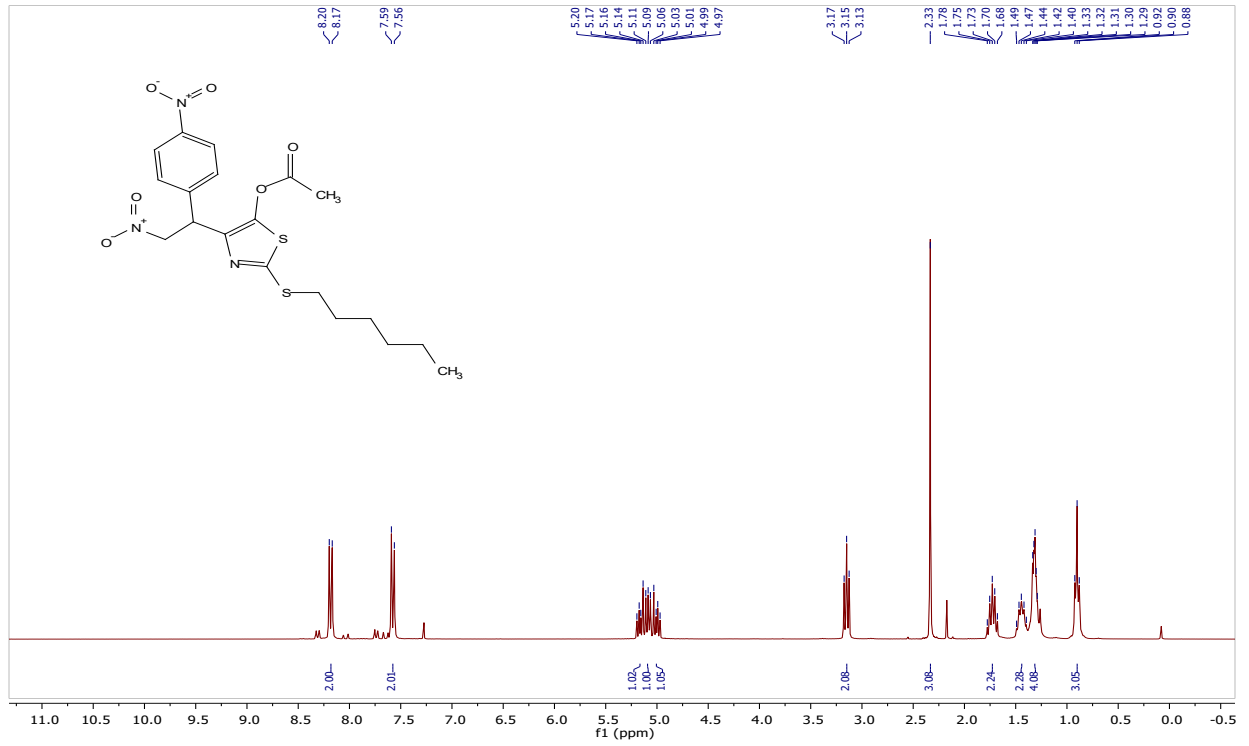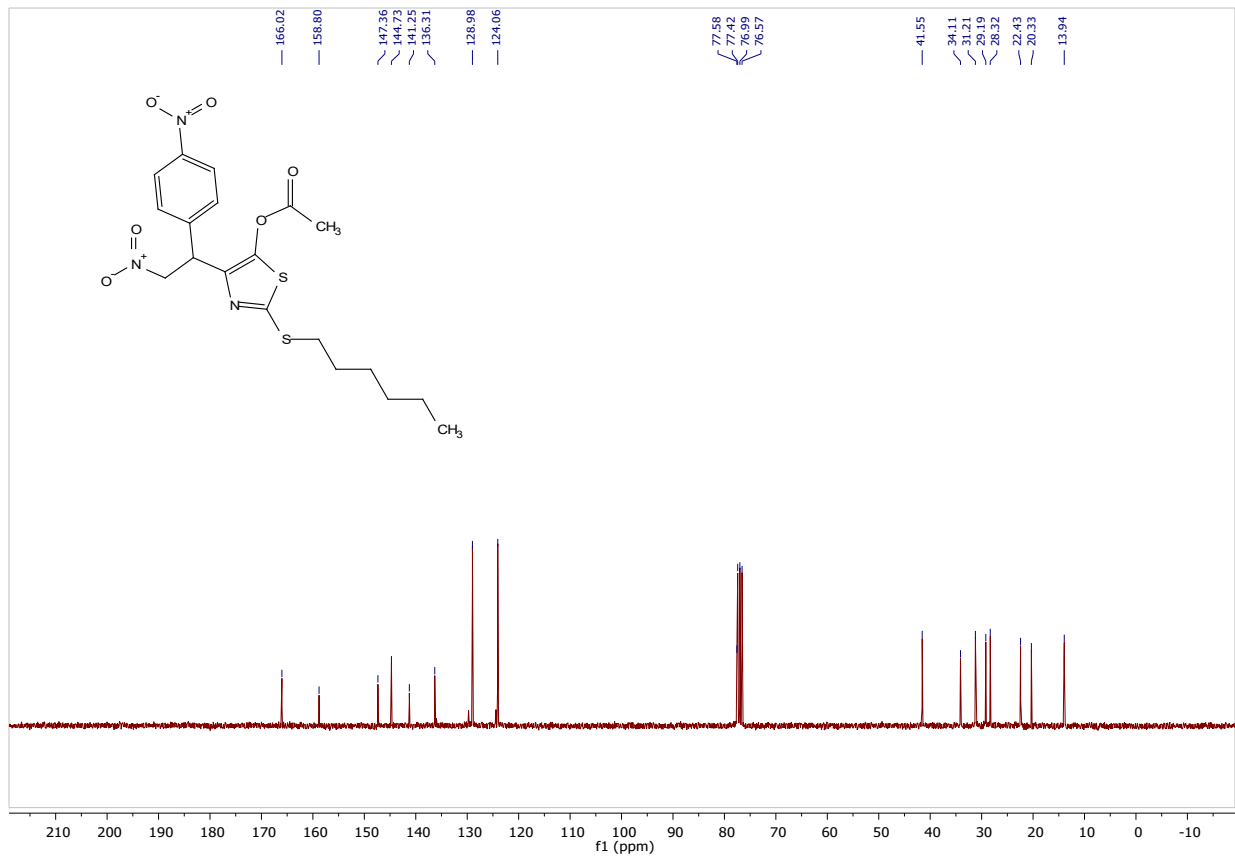

Supplement: d2ob00448h1.pdf [file d2ob00448h1.pdf]
